# Supplementary material for: Runx1 and Runx2 inhibit fibrotic conversion of cellular niches for hematopoietic stem cells
Source: Springer Nature journal article supplement (doi:10.1038/s41467-022-30266-y), 2022-05-12
Supplement: 41467_2022_30266_MOESM1_ESM.pdf [file 41467_2022_30266_MOESM1_ESM.pdf]

**Supplemental Information.**

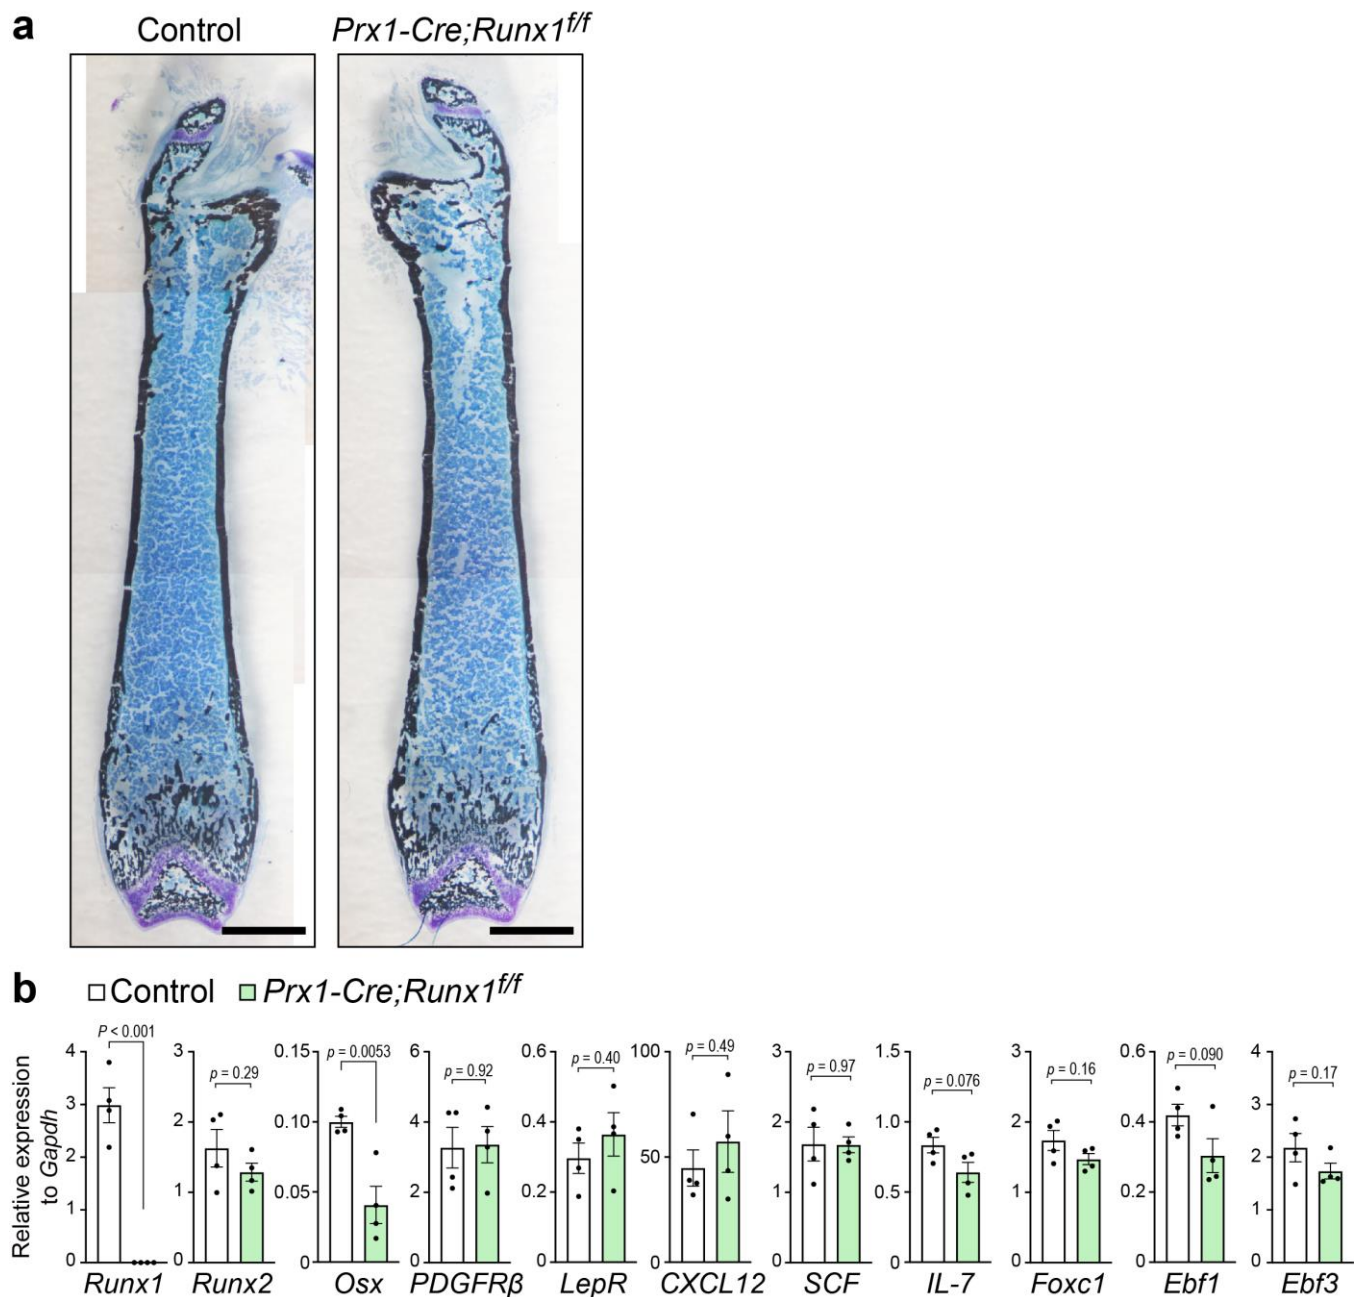

**Supplementary Figure 1. Runx1 is dispensable for the development of HSC niches**

**a,b** Bone marrow from 3-week-old control and *Prx1-Cre;Runx1<sup>fl/fl</sup>* mice was analyzed.

**a** von Kossa and toluidine blue staining of femurs. Bars: 1 mm.

**b** Relative mRNA expression levels of *Runx1*, *Runx2*, *Osx*, *PDGFRβ*, *LepR*, *CXCL12*, *SCF*, *IL-7*, *Foxc1*, *Ebf1*, and *Ebf3* in sorted CAR cells (n = 4 mice per group).

All error bars represent SD of the mean. Statistical significances were calculated using the two-tailed unpaired Student's *t*-test. Source data are provided as a Source Data file.

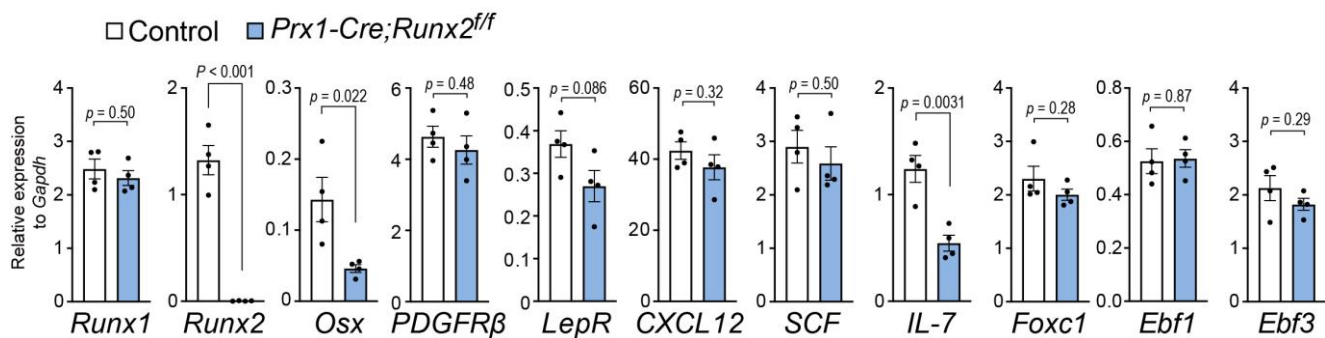

### Supplementary Figure 2. HSC niches are formed in mice lacking Runx2

Relative mRNA expression levels of *Runx1*, *Runx2*, *Osx*, *PDGFRβ*, *LepR*, *CXCL12*, *SCF*, *IL-7*, *Foxc1*, *Ebf1*, and *Ebf3* in sorted CAR cells from 3-week-old control and *Prx1-Cre;Runx2<sup>ff</sup>;CXCL12-GFP* mice (n = 4 mice per group). All error bars represent SD of the mean. Statistical significances were calculated using the two-tailed unpaired Student's *t*-test. Source data are provided as a Source Data file.

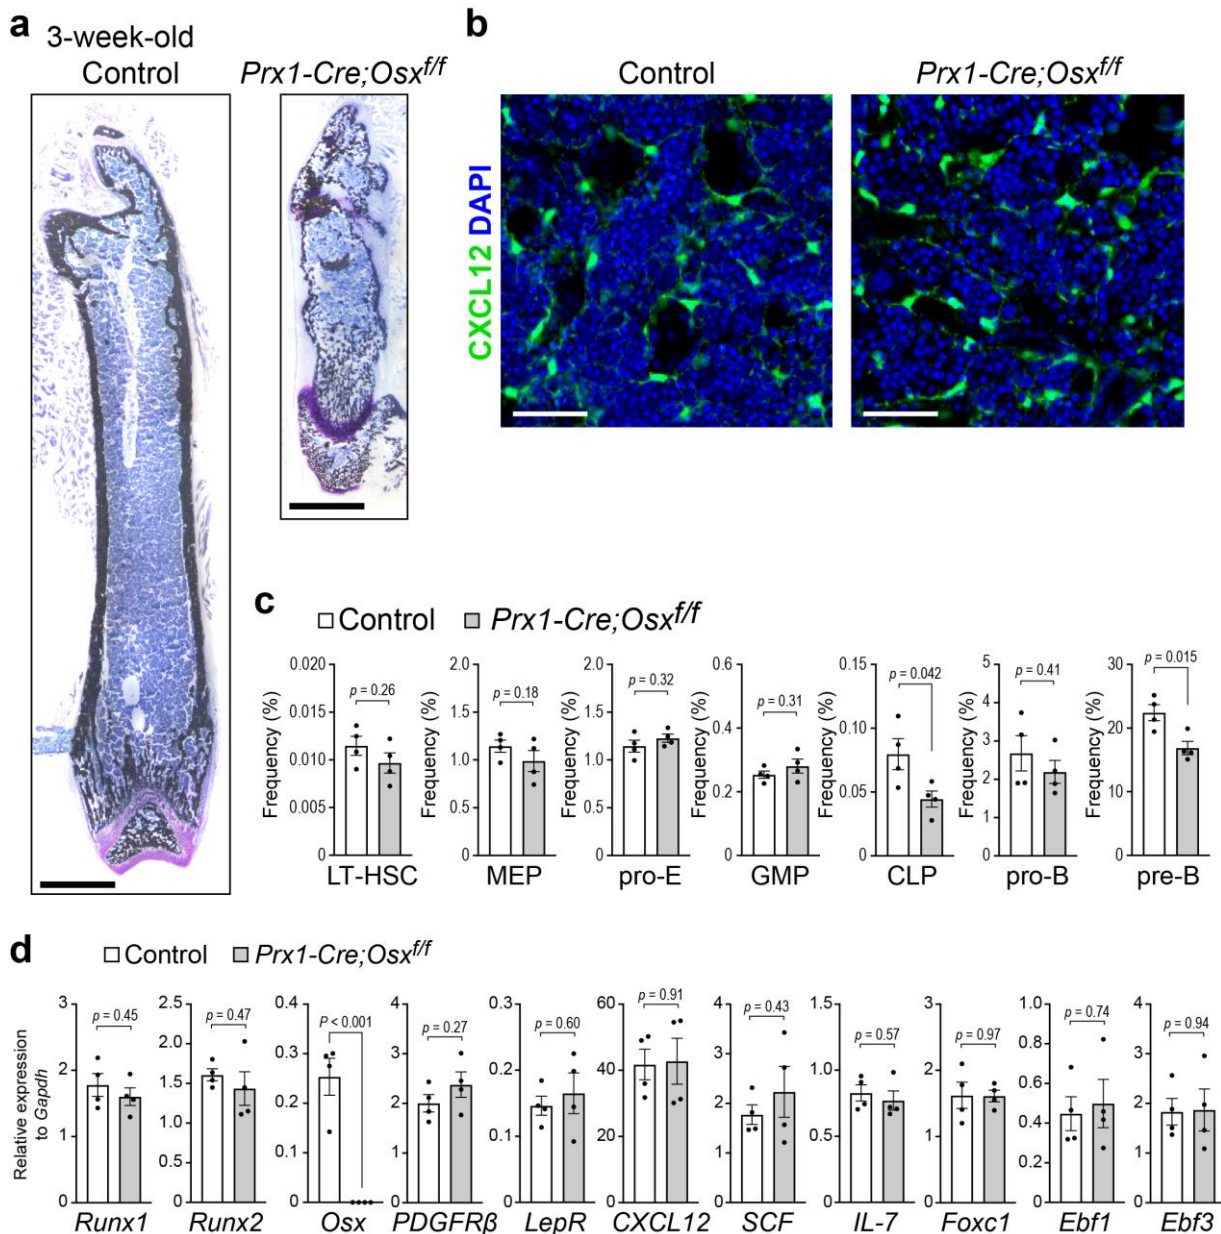

### Supplementary Figure 3. HSC niches are formed in mice lacking Osterix

**a-d** Bone marrow from 3-week-old control and *Prx1-Cre;Osx<sup>ff</sup>;CXCL12-GFP* mice was analyzed.

**a** von Kossa and toluidine blue staining of femurs. Bars: 1 mm.

**b** Confocal microscopy images showing expression of CXCL12-GFP. Bars: 100  $\mu$ m.

**c** Frequencies of LT-HSCs, MEPs, pro-E, GMPs, CLPs, pro-B cells, and pre-B cells (n = 4 mice per group).

**d** Relative mRNA expression levels of *Runx1*, *Runx2*, *Osx*, *PDGFRβ*, *LepR*, *CXCL12*, *SCF*, *IL-7*, *Foxc1*, *Ebf1*, and *Ebf3* in sorted CAR cells (n = 4 mice per group).

All error bars represent SD of the mean. Statistical significances were calculated using the two-tailed unpaired Student's *t*-test. Source data are provided as a Source Data file.

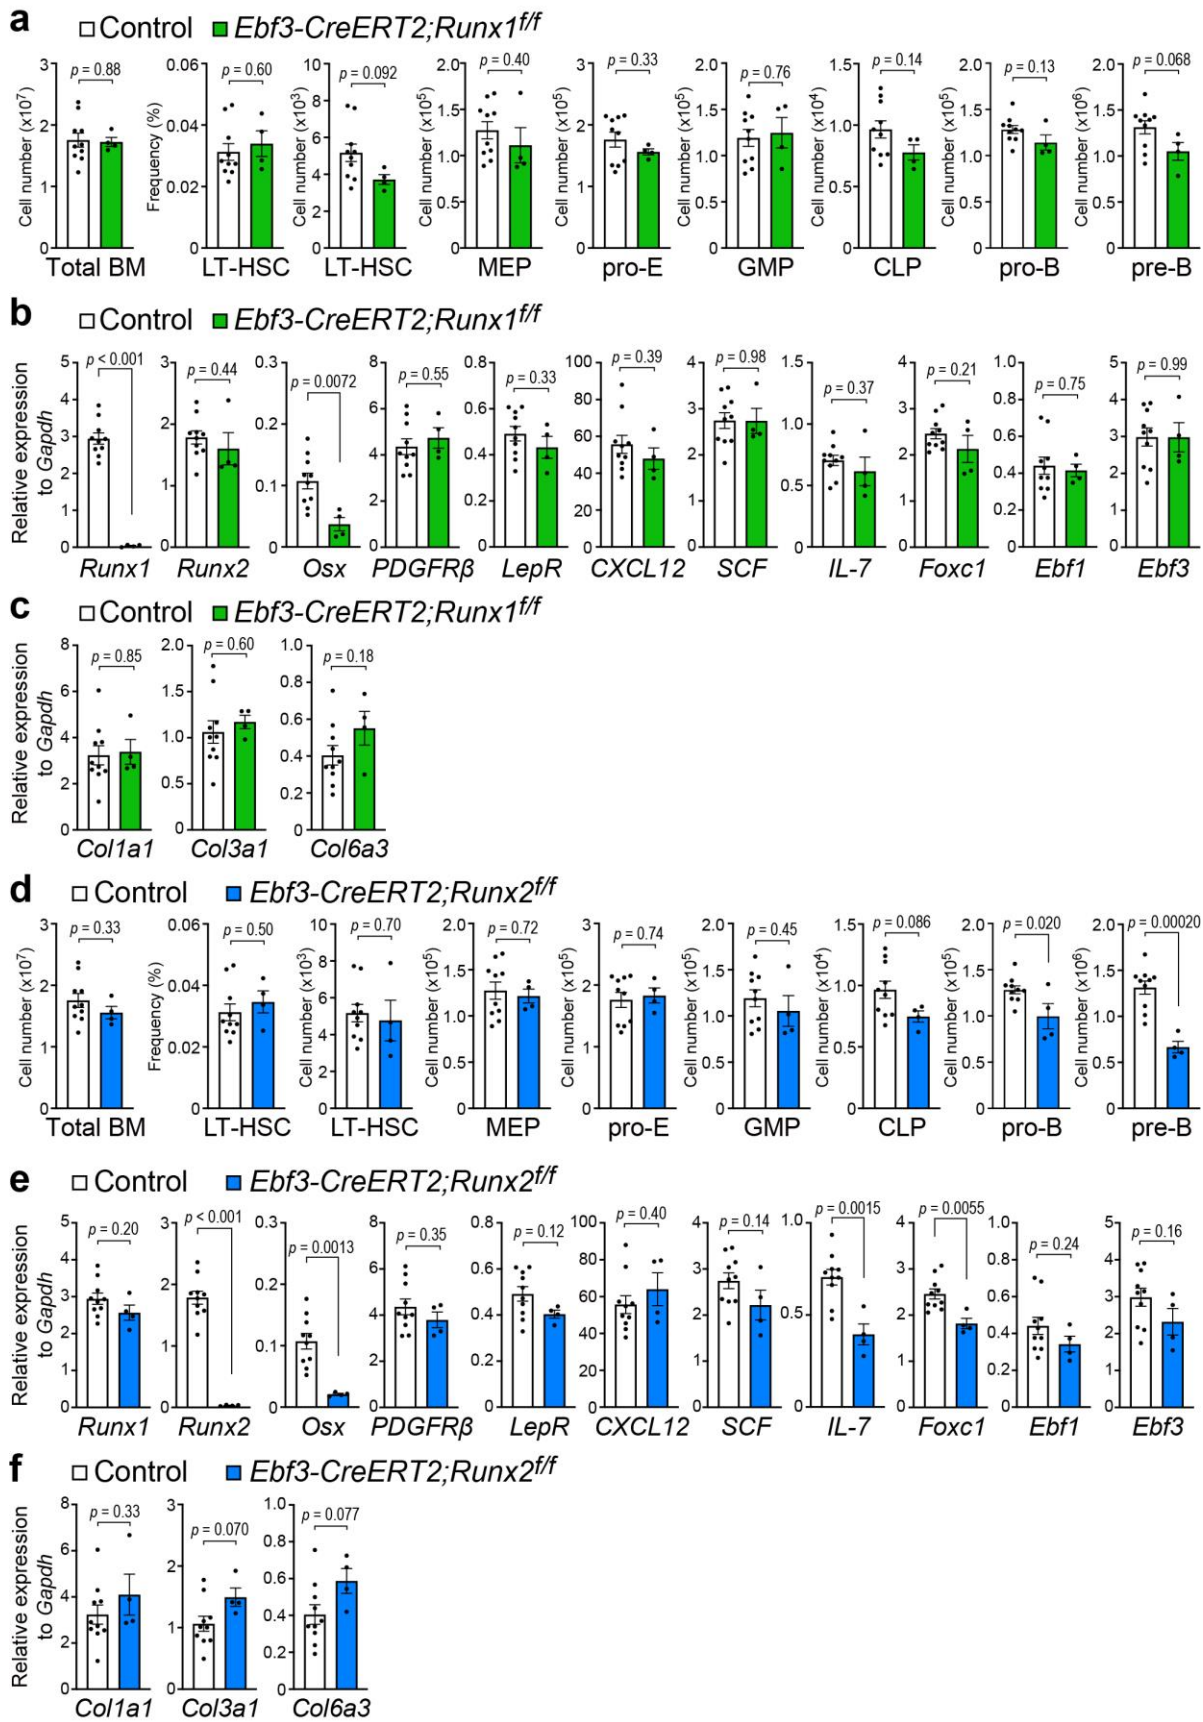

**Supplementary Figure 4. Runx1 and Runx2 are dispensable for the maintenance of HSC niches**

**a-f** Bone marrow from 20- to 24-week-old tamoxifen-treated control (n = 10 mice), *Ebf3-CreERT2;Runx1<sup>ff</sup>* (n = 4 mice) (**a-c**), or *Ebf3-CreERT2;Runx2<sup>ff</sup>* (n = 4 mice) (**d-f**) mice was analyzed.

**a,d** Total hematopoietic cell counts, frequencies of LT-HSCs, and the numbers of LT-HSCs, MEPs, pro-E, GMPs, CLPs, pro-B cells, and pre-B cells in femurs and tibias.

**b,c,e,f** Relative mRNA expression levels of *Runx1*, *Runx2*, *Osx*, *PDGFR $\beta$* , *LepR*, *CXCL12*, *SCF*, *IL-7*, *Foxc1*, *Ebf1*, and *Ebf3* (**b,e**), *Colla1*, *Col3a1*, and *Col6a3* (**c,f**) in sorted CAR cells.

All error bars represent SD of the mean. Statistical significances were calculated using the two-tailed unpaired Student's *t*-test. Source data are provided as a Source Data file.

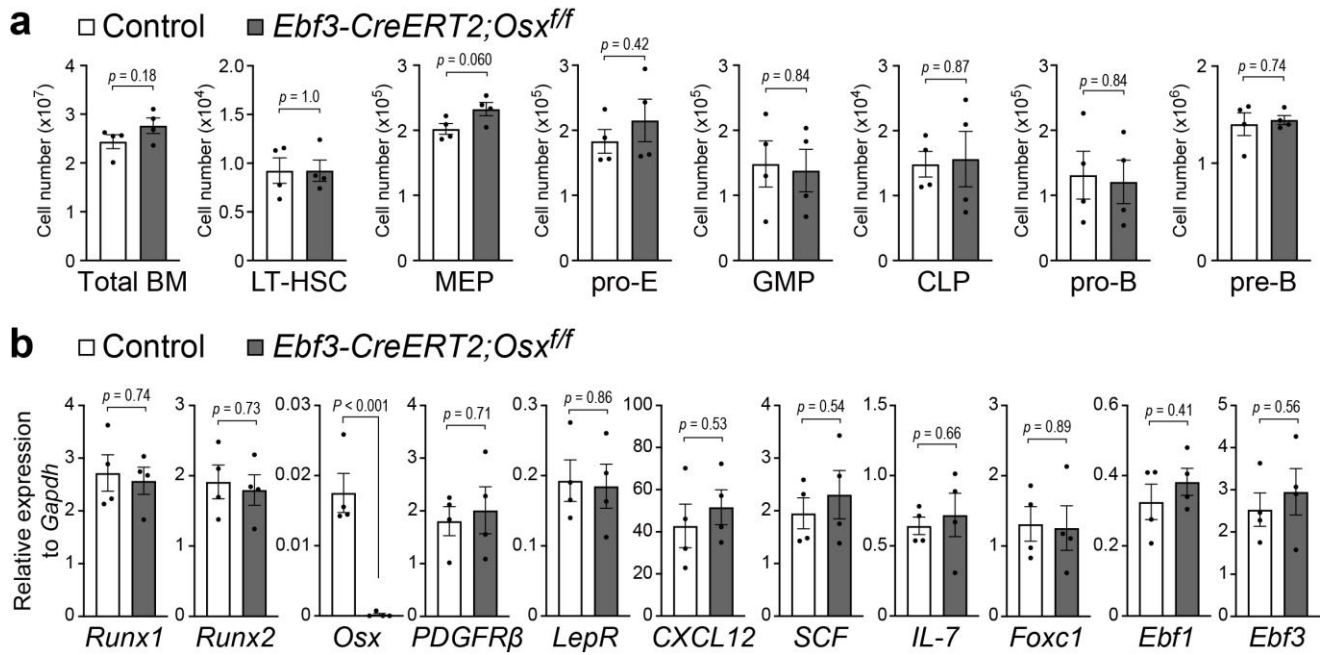

**Supplementary Figure 5. Osterix is dispensable for the maintenance of HSC niches**

**a,b** Bone marrow from 20- to 24-week-old tamoxifen-treated control and *Ebf3-CreERT2;Osx<sup>f/f</sup>* mice was analyzed.

**a** Total hematopoietic cell counts and the numbers of LT-HSCs, MEPs, pro-E, GMPs, CLPs, pro-B cells, and pre-B cells in femurs and tibias (n = 4 mice per group).

**b** Relative mRNA expression levels of *Runx1*, *Runx2*, *Osx*, *PDGFRβ*, *LepR*, *CXCL12*, *SCF*, *IL-7*, *Foxc1*, *Ebf1*, and *Ebf3* in sorted CAR cells (n = 4 mice per group).

All error bars represent SD of the mean. Statistical significances were calculated using the two-tailed unpaired Student's *t*-test. Source data are provided as a Source Data file.

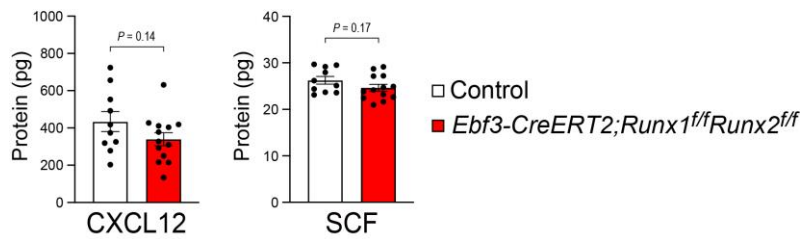

**Supplementary Figure 6. Protein expression of CXCL12 and SCF in mice lacking both Runx1 and Runx2 in CAR cells**

Humeri from 20- to 24-week-old tamoxifen-treated control (n = 10 mice) and *Ebf3-CreERT2;Runx1<sup>ff</sup>Runx2<sup>ff</sup>* mice (n = 13 mice) were analyzed. All error bars represent SD of the mean. Statistical significances were calculated using the two-tailed unpaired Student's *t*-test. Source data are provided as a Source Data file.

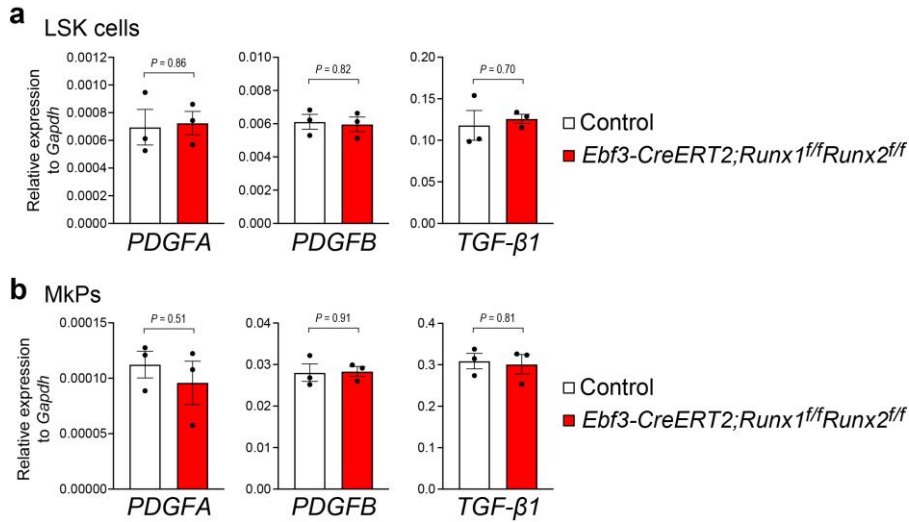

**Supplementary Figure 7. The expression of *PDGFs* and *TGF-β1* was unaltered in HSPCs and MkPs from mice lacking both *Runx1* and *Runx2* in CAR cells**

**a,b** Femurs and tibias from 20- to 24-week-old tamoxifen-treated control and *Ebf3-CreERT2;Runx1<sup>ff</sup>Runx2<sup>ff</sup>* mice were analyzed (n = 3 mice per group). Relative mRNA expression levels of *PDGFA*, *PDGFB*, and *TGF-β1* in sorted LSK cells (**a**) and MkPs (**b**). All error bars represent SD of the mean. Statistical significances were calculated using the two-tailed unpaired Student's *t*-test. Source data are provided as a Source Data file.



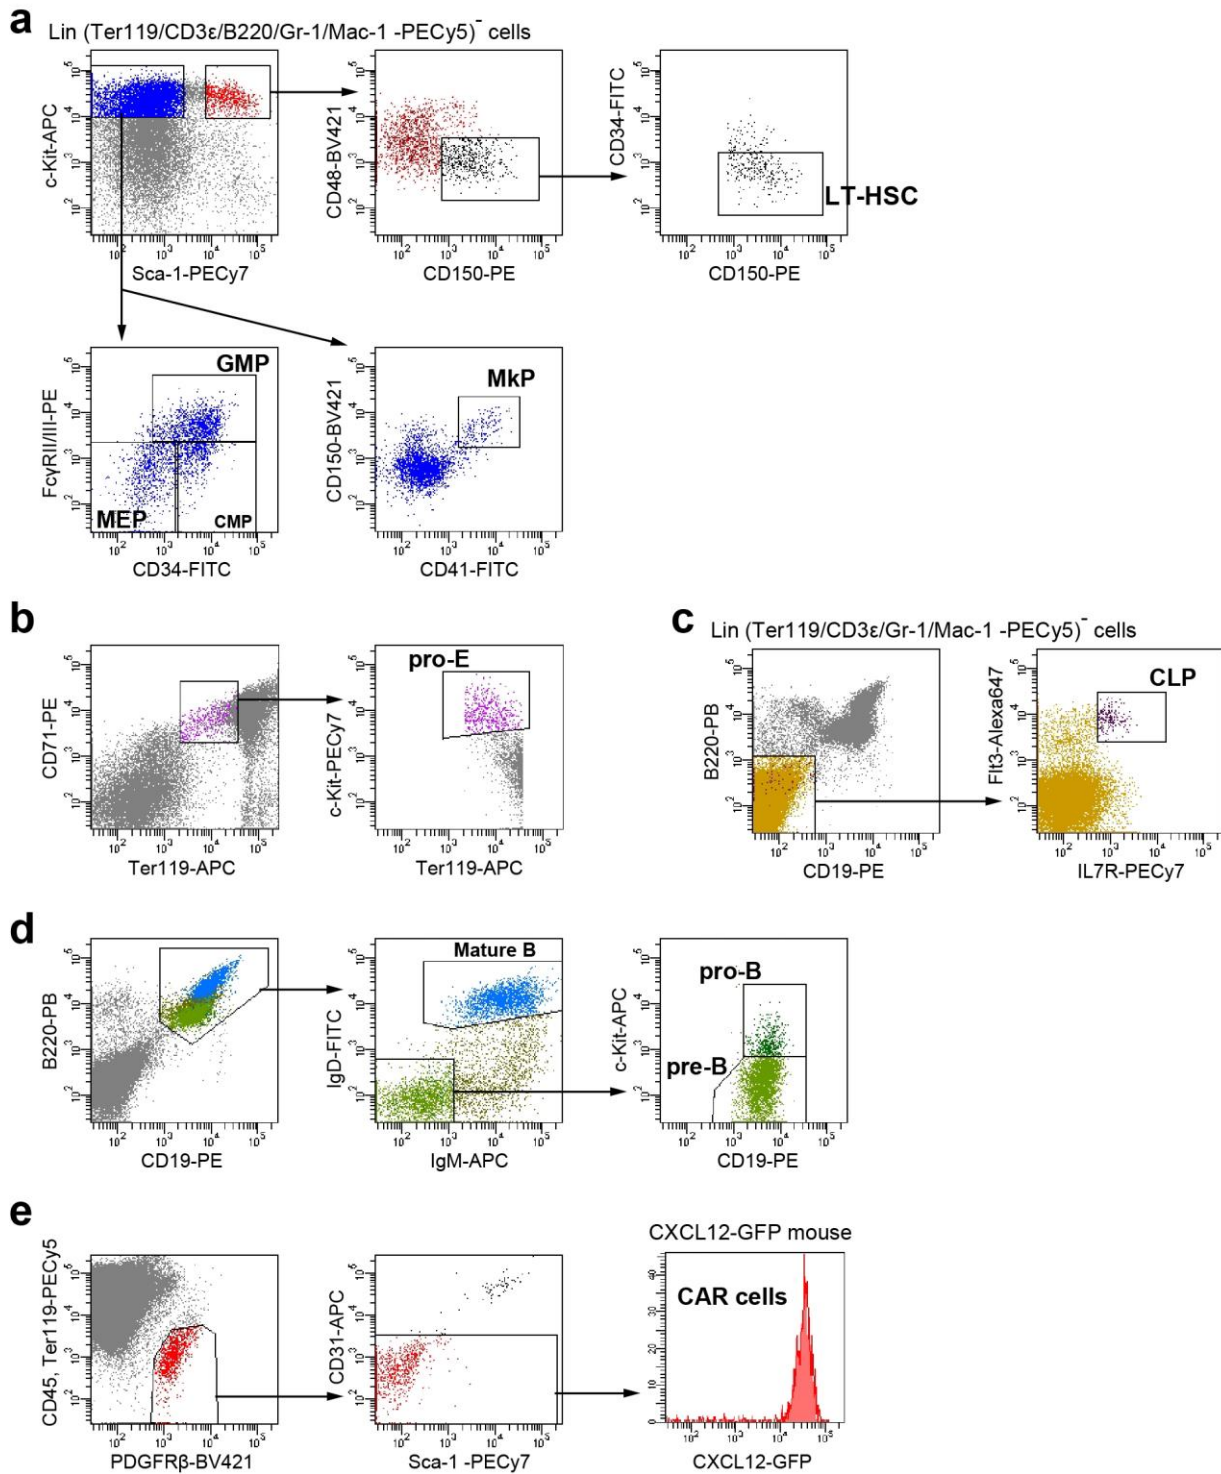

**Supplementary Figure 8. FACS Gating strategies for HSPCs and CAR cells**

FACS Gating strategies for LT-HSCs, MEPs, GMPs, Mkps (a), proerythroblasts (pro-E) (b), CLPs (c), pro-B cells, pre-B cells (d), and CAR cells (e).

| Gene Name                         | Sequence (5' - 3')                                                    |
|-----------------------------------|-----------------------------------------------------------------------|
| Mouse                             |                                                                       |
| <i>Gapdh</i>                      | TCA TGA GCC CTT CCA CAA TG<br>GGT GTG AAC CAC GAG AAA TAT GAC         |
| <i>Runx1</i>                      | GGC AAC GAT GAA AAC TAC TCG GC<br>TCT ACC GCT CCG CCC GAC             |
| <i>Runx1b</i> (proximal) specific | ATG GGA ATT TTG CCT CCG GG<br>GTG GGC AAC CAG AAT TCA AA              |
| <i>Runx1c</i> (distal) specific   | ATA GAA TCC CCC GCC TTC AG<br>CTC TCA TGA AGC ACT GTG GA              |
| <i>Runx2</i>                      | GAC TGT GGT TAC CGT CAT GGC<br>GGG GAC CGT CCA CTG TCA C              |
| <i>Osx</i> ( <i>Sp7</i> )         | ATG GCG TCC TCT CTG CTT G<br>TGA AAG GTC AGC GTA TGG CTT              |
| <i>Pdgfrb</i>                     | CAA CTC ACT AGG GCC GGA G<br>GCA CGG AAT TGT CGT CTC AG               |
| <i>Lepr</i>                       | ATG CCC CAA TTT CAA ACC TG<br>GGA ACC TTG AGG CTT CTT GGA             |
| <i>CXCL12</i>                     | CCA GAG CCA ACG TCA AGC AT<br>CAG CCG TGC AAC AAT CTG AA              |
| <i>SCF</i> ( <i>Kitl</i> )        | GGT AGC TAG TTC TAT CCA TGC GGT<br>CCT GTA AGG ACT TTT CTG GAG AGT CT |
| <i>IL7</i>                        | TCC TCC ACT GAT CCT TGT TC<br>CTT CAA CTT GCG AGC AGC AC              |
| <i>Foxc1</i>                      | GGT ACA GAG ACT GAC TGG CA<br>TTC TAA CCT GCG GAA ATC CAAC            |
| <i>Ebf1</i>                       | CAC TCG GTG CGG GAA ATG T<br>CAC AAA GGC CGT CCT CTC AA               |
| <i>Ebf3</i>                       | CGA AAG GAC CGC TTT TGT GG<br>AGT GAA TGC CGT TGT TGG TTT             |
| <i>Col1a1</i>                     | CAC CCT CAA GAG CCT GAG TC<br>GTT CGG GCT GAT GTA CCA GT              |
| <i>Col3a1</i>                     | CTG TAA CAT GGA AAC TGG GGA AA<br>CCA TAG CTG AAC TGA AAA CCA CC      |
| <i>Col6a3</i>                     | GAG GTT GGA AAT TGG ACA GGA C<br>CCG TAC AGC AGT TAT GGC ATC          |
| <i>Pdpn</i>                       | GAG GGC TTA ATG AAT CTA CTG GC<br>GAC AGT TCC TCT AAG GGA GGC         |
| <i>Pdgfra</i>                     | CCC TAT CCT GGC ATG ATG GTC<br>TGA GGT GGT AGA AGG AGG GTC            |
| <i>Gli1</i>                       | CCA AGC CAA CTT TAT GTC AGG G<br>AGC CCG CTT CTT TGT TAA TTT GA       |
| <i>Ly6a</i>                       | AGG AGG CAG CAG TTA TTG TGG<br>CGT TGA CCT TAG TAC CCA GGA            |
| <i>Pdgfa</i>                      | TGG CTC GAA GTC AGA TCC ACA<br>TTC TCG GGC ACA TGG TTA ATG            |
| <i>Pdgfb</i>                      | AAG TGT GAG ACA ATA GTG ACC CC<br>CAT GGG TGT GCT TAA ACT TTC G       |
| <i>Tgfb1</i>                      | CTT CAA TAC GTC AGA CAT TCG GG<br>GTA ACG CCA GGA ATT GTT GCT A       |

Supplementary Table 1. The primer pairs used for qRT-PCR
