# Supplementary material for: Runx1 and Runx2 inhibit fibrotic conversion of cellular niches for hematopoietic stem cells
Source: Springer Nature journal article supplement (doi:10.1038/s41467-022-30266-y), 2022-05-12
Supplement: 41467_2022_30266_MOESM2_ESM.pdf [file 41467_2022_30266_MOESM2_ESM.pdf]

## Reporting Summary

Nature Portfolio wishes to improve the reproducibility of the work that we publish. This form provides structure for consistency and transparency in reporting. For further information on Nature Portfolio policies, see our [Editorial Policies](#) and the [Editorial Policy Checklist](#).

### Statistics

For all statistical analyses, confirm that the following items are present in the figure legend, table legend, main text, or Methods section.

n/a Confirmed

- |                                     |                                     |                                                                                                                                                                                                                                                            |
|-------------------------------------|-------------------------------------|------------------------------------------------------------------------------------------------------------------------------------------------------------------------------------------------------------------------------------------------------------|
| <input type="checkbox"/>            | <input checked="" type="checkbox"/> | The exact sample size ( $n$ ) for each experimental group/condition, given as a discrete number and unit of measurement                                                                                                                                    |
| <input type="checkbox"/>            | <input checked="" type="checkbox"/> | A statement on whether measurements were taken from distinct samples or whether the same sample was measured repeatedly                                                                                                                                    |
| <input type="checkbox"/>            | <input checked="" type="checkbox"/> | The statistical test(s) used AND whether they are one- or two-sided<br><i>Only common tests should be described solely by name; describe more complex techniques in the Methods section.</i>                                                               |
| <input checked="" type="checkbox"/> | <input type="checkbox"/>            | A description of all covariates tested                                                                                                                                                                                                                     |
| <input type="checkbox"/>            | <input checked="" type="checkbox"/> | A description of any assumptions or corrections, such as tests of normality and adjustment for multiple comparisons                                                                                                                                        |
| <input type="checkbox"/>            | <input checked="" type="checkbox"/> | A full description of the statistical parameters including central tendency (e.g. means) or other basic estimates (e.g. regression coefficient) AND variation (e.g. standard deviation) or associated estimates of uncertainty (e.g. confidence intervals) |
| <input type="checkbox"/>            | <input checked="" type="checkbox"/> | For null hypothesis testing, the test statistic (e.g. $F$ , $t$ , $r$ ) with confidence intervals, effect sizes, degrees of freedom and $P$ value noted<br><i>Give <math>P</math> values as exact values whenever suitable.</i>                            |
| <input checked="" type="checkbox"/> | <input type="checkbox"/>            | For Bayesian analysis, information on the choice of priors and Markov chain Monte Carlo settings                                                                                                                                                           |
| <input checked="" type="checkbox"/> | <input type="checkbox"/>            | For hierarchical and complex designs, identification of the appropriate level for tests and full reporting of outcomes                                                                                                                                     |
| <input checked="" type="checkbox"/> | <input type="checkbox"/>            | Estimates of effect sizes (e.g. Cohen's $d$ , Pearson's $r$ ), indicating how they were calculated                                                                                                                                                         |

*Our web collection on [statistics for biologists](#) contains articles on many of the points above.*

### Software and code

Policy information about [availability of computer code](#)

Data collection

FACS Diva 8.0.1, Zeiss ZEN 3.0 SR

Data analysis

FACS Diva 8.0.1, GraphPad PRISM 9.3.1, TRI/3D-BON

For manuscripts utilizing custom algorithms or software that are central to the research but not yet described in published literature, software must be made available to editors and reviewers. We strongly encourage code deposition in a community repository (e.g. GitHub). See the Nature Portfolio [guidelines for submitting code & software](#) for further information.

### Data

Policy information about [availability of data](#)

All manuscripts must include a [data availability statement](#). This statement should provide the following information, where applicable:

- Accession codes, unique identifiers, or web links for publicly available datasets
- A description of any restrictions on data availability
- For clinical datasets or third party data, please ensure that the statement adheres to our [policy](#)

Source data are provided with this paper.

### Field-specific reporting

# Life sciences study design

All studies must disclose on these points even when the disclosure is negative.

|                 |                                                                                                                                                                                                             |
|-----------------|-------------------------------------------------------------------------------------------------------------------------------------------------------------------------------------------------------------|
| Sample size     | No statistical method was used to predetermine sample size.<br>Sample sizes were chosen based on extensive experience with similar experiments in our laboratory (Omatsu et al., 2014, Seike et al., 2018). |
| Data exclusions | No data were excluded.                                                                                                                                                                                      |
| Replication     | All experiments were repeated at least three times with sufficient reproducibility.                                                                                                                         |
| Randomization   | All samples and animals were analysed and allocated randomly.                                                                                                                                               |
| Blinding        | The investigators were not blinded to allocation during experiments. Blinding was not possible as the same investigator performed genotyping and analysis.                                                  |

## Reporting for specific materials, systems and methods

We require information from authors about some types of materials, experimental systems and methods used in many studies. Here, indicate whether each material, system or method listed is relevant to your study. If you are not sure if a list item applies to your research, read the appropriate section before selecting a response.

### Materials & experimental systems

| n/a                                 | Involved in the study                                           |
|-------------------------------------|-----------------------------------------------------------------|
| <input type="checkbox"/>            | <input checked="" type="checkbox"/> Antibodies                  |
| <input type="checkbox"/>            | <input checked="" type="checkbox"/> Eukaryotic cell lines       |
| <input checked="" type="checkbox"/> | <input type="checkbox"/> Palaeontology and archaeology          |
| <input type="checkbox"/>            | <input checked="" type="checkbox"/> Animals and other organisms |
| <input checked="" type="checkbox"/> | <input type="checkbox"/> Human research participants            |
| <input checked="" type="checkbox"/> | <input type="checkbox"/> Clinical data                          |
| <input checked="" type="checkbox"/> | <input type="checkbox"/> Dual use research of concern           |

### Methods

| n/a                                 | Involved in the study                              |
|-------------------------------------|----------------------------------------------------|
| <input checked="" type="checkbox"/> | <input type="checkbox"/> ChIP-seq                  |
| <input type="checkbox"/>            | <input checked="" type="checkbox"/> Flow cytometry |
| <input checked="" type="checkbox"/> | <input type="checkbox"/> MRI-based neuroimaging    |

## Antibodies

### Antibodies used

B220-PE/Cy5 (1:800, RA3-6B2, 15-0452-83, eBioscience), B220-PE (1:200, RA3-6B2, 103208, Biolegend), B220-PB (1:100, RA3-6B2, 103227, Biolegend), CD3ε-PE/Cy5 (1:400, 145-2C11, 100310, Biolegend), CD3ε-APC (1:100, 145-2C11, 100312, Biolegend), CD11b-PE/Cy5 (1:1600, M1/70, 101210, Biolegend), CD11b-PE/Cy7 (1:100, M1/70, 101216, Biolegend), CD19-PE/Cy5 (1:100, 1D3, 115510, Biolegend), CD19-PE (1:100, 1D3, 2016867, eBioscience), CD31-APC (1:200, MEC13.3, 102516, Biolegend), CD34-FITC (1:25, RAM34, 11-0341-85, eBioscience), CD41-FITC (1:100, MWReg30, 553848, BD Pharmingen), CD45-PE/Cy5 (1:800, 30-F11, 103110, Biolegend), CD45.1-FITC (1:100, A20, 110706, Biolegend), CD45.2-APCe780 (1:100, 104, 47-0454-82, eBioscience), CD48-PB (1:200, HM48-1, 103418, Biolegend), CD71-PE (1:400, C2, 553267, BD Pharmingen), CD150-BV421 (1:50, TC15-12F12.2, 115925, Biolegend), CD150-PE (1:100, TC15-12F12.2, 115904, Biolegend), c-Kit-APC (1:200, 2B8, 2078220, eBioscience), c-Kit-PE/Cy7 (1:200, 2B8, 105814, Biolegend), FcγR II/III-PE (1:100, 2.4G2, 553145, BD Pharmingen), Flt3-Biotin (1:100, A2F10, 135308, Biolegend), F4/80-Alexa 647 (1:500, BM8, 123122, Biolegend), Gr-1-PB (1:400, RB6-8C5, 108430, Biolegend), IgM-APC (1:100, II/41, 2056825, eBioscience), IgD-FITC (1:200, 11-26c.2a, 405704, Biolegend), IL-7Rα-PE/Cy5 (1:50, A7R34, 15-1271-83, eBioscience), IL-7Rα-PE/Cy7 (1:100, A7R34, 135014, Biolegend), NK1.1-PE (1:100, PK136, 553165, BD Pharmingen), PDCA-1-FITC (1:50, JF05-1C2.4.1, 130-102-229, Miltenyi Biotec), Sca-1-PE/Cy7 (1:100, E13-161.7, 108114, Biolegend), Ter119-PE/Cy5 (1:400, Ter119, 116210, Biolegend), Ter119-APC (1:100, Ter119, 116212, Biolegend), PDGFRβ-Biotin (1:200, BAF1042, R&D), TRAP (1:100, ab185716, Abcam), and Col3a1(1:100, ab7778, Abcam)  
BV421-streptavidin (405225, Biolegend), DyLight 649-streptavidin (405224, Biolegend).

### Validation

All antibodies were validated by their manufacturers.  
Statements for validation of antibodies can be found from these manufacturers' websites.  
Biolegend (<https://www.biolegend.com/ja-jp>)  
eBioscience (<https://www.thermofisher.com/jp/ja/home/life-science/cell-analysis/flow-cytometry.html>)  
BD Pharmingen (<https://www.bdbiosciences.com/en-us>)  
Miltenyi Biotec (<https://www.miltenyibiotec.com/US-en/>)  
R&D (<https://www.rndsystems.com/>)  
Abcam (<https://www.abcam.co.jp/>)

## Eukaryotic cell lines

Policy information about [cell lines](#)

### Cell line source(s)

Plat-E (Cell Biolabs).

|                                                                      |                                                        |
|----------------------------------------------------------------------|--------------------------------------------------------|
| Authentication                                                       | No authenticated.                                      |
| Mycoplasma contamination                                             | Not tested.                                            |
| Commonly misidentified lines<br>(See <a href="#">ICLAC</a> register) | No commonly misidentified line was used in this study. |

## Animals and other organisms

Policy information about [studies involving animals](#); [ARRIVE guidelines](#) recommended for reporting animal research

|                         |                                                                                                                                                                                                                                                                                                                                                                                                                                                                                                                                                                                                                                                                                                                                                                                                                                                                                                                                                                                                                                                 |
|-------------------------|-------------------------------------------------------------------------------------------------------------------------------------------------------------------------------------------------------------------------------------------------------------------------------------------------------------------------------------------------------------------------------------------------------------------------------------------------------------------------------------------------------------------------------------------------------------------------------------------------------------------------------------------------------------------------------------------------------------------------------------------------------------------------------------------------------------------------------------------------------------------------------------------------------------------------------------------------------------------------------------------------------------------------------------------------|
| Laboratory animals      | Male and female mice were used between 3 weeks to 24 weeks of age or at the age of embryonic day 16.5, depending on the respective experiments. C57BL/6J mice (Ly5.2) were purchased from Japan SLC (Shizuoka, Japan). Prx1-Cre mice (005584) and Osx-GFP knock-in mice (006361) were purchased from Jackson Laboratory. Ebf3-CreERT2 mice and CXCL12-GFP knock-in mice were generated in our laboratory and have been previously described. Runx1f/f mice were provided by S. Takeda. Sp7f/f mice were provided by R. Nishimura. Runx2f/f mice were generated with two loxP sites flanking exon 4 of Runx2 by electroporation of a targeting vector into embryonic stem cells. All mice were bred and maintained under specific pathogen-free conditions at the animal facilities of Osaka University. These mice were maintained in 12 hour light/dark cycle, and the housing temperature and humidity were $23\pm 1.5^{\circ}\text{C}$ and $45\pm 15\%$ , respectively. All mouse strains used are reported in Materials and Methods: "Mice" |
| Wild animals            | This study did not involve wild animals.                                                                                                                                                                                                                                                                                                                                                                                                                                                                                                                                                                                                                                                                                                                                                                                                                                                                                                                                                                                                        |
| Field-collected samples | This study did not involve field-collected samples.                                                                                                                                                                                                                                                                                                                                                                                                                                                                                                                                                                                                                                                                                                                                                                                                                                                                                                                                                                                             |
| Ethics oversight        | All animal experiments were performed in accordance with approved protocols of the Institutional Animal Care and Use Committees at Osaka University and Kyoto University.                                                                                                                                                                                                                                                                                                                                                                                                                                                                                                                                                                                                                                                                                                                                                                                                                                                                       |

Note that full information on the approval of the study protocol must also be provided in the manuscript.

## Flow Cytometry

### Plots

Confirm that:

- The axis labels state the marker and fluorochrome used (e.g. CD4-FITC).
- The axis scales are clearly visible. Include numbers along axes only for bottom left plot of group (a 'group' is an analysis of identical markers).
- All plots are contour plots with outliers or pseudocolor plots.
- A numerical value for number of cells or percentage (with statistics) is provided.

### Methodology

|                           |                                                                                                                                                                                                                                                                                                                                                                                                                                                 |
|---------------------------|-------------------------------------------------------------------------------------------------------------------------------------------------------------------------------------------------------------------------------------------------------------------------------------------------------------------------------------------------------------------------------------------------------------------------------------------------|
| Sample preparation        | Bone marrow cells were isolated by flushing or crushing from femurs and tibias. Bone marrow non-hematopoietic cells were isolated by flushing or crushing from femurs, tibias, and humeri followed by enzymatic digestion with collagenase type I (Gibco) and DNase I (Sigma). Cells in bone fractions, including osteoblasts and PaS cells, were isolated by mechanical disruption and collagenase digestion of bones as described previously. |
| Instrument                | BD FACS Aria (BD Biosciences)                                                                                                                                                                                                                                                                                                                                                                                                                   |
| Software                  | FACS Diva 8.0.1 (BD Biosciences)                                                                                                                                                                                                                                                                                                                                                                                                                |
| Cell population abundance | Abundance of relevant cell population within post-sort fraction and purity of sorted cell population was validated from reanalysis by flow cytometry.                                                                                                                                                                                                                                                                                           |
| Gating strategy           | FSC-A/SSC-A was used for gating mononuclear cells. FSC-W/FSC-H was used for gating on singlets. Specific gating strategies are included in Supplementary Fig. 8.                                                                                                                                                                                                                                                                                |

- Tick this box to confirm that a figure exemplifying the gating strategy is provided in the Supplementary Information.
