# Supplementary material for: Runx1 and Runx2 inhibit fibrotic conversion of cellular niches for hematopoietic stem cells
Source: Nat Commun. 2022 May 12;13:2654. doi: 10.1038/s41467-022-30266-y (PMC9098511; doi:10.1038/s41467-022-30266-y)
Supplement: Supplementary file 3 — Source Data [file 41467_2022_30266_MOESM3_ESM.xlsx]

## Sheet: Fig1
	Fig1a	Runx1 gene expression (Gapdh=1)
		CAR	Ob	EC	PaS	LT-HSC	pro-B	Pre-B	Mφ
		2.35508	0.33691	0.00585332	0.0956343	0.387857	0.274713	0.280701	0.202251
		3.07397	0.510118	0.0295503	0.219497	0.318494	0.260745	0.264351	0.200786
		3.29761	0.315622	0.0108152	0.199206	0.241053	0.152973	0.234396	0.117991
	avr.	2.90889	0.38755	0.0154063	0.171446	0.315801	0.229477	0.259816	0.173676
	stdev.	0.492473	0.106679	0.0124978	0.0664339	0.0734389	0.0666214	0.0234837	0.0482299
	P value (CAR vs.)		<0.0001	<0.0001	<0.0001	<0.0001	<0.0001	<0.0001	<0.0001
	Fig1b	Runx1b/Runx1c ratio
		CAR	LT-HSC	Pre-B
		4.96101	0.119443	0.271153
		6.18377	0.18764	0.198503
		4.79859	0.0776715	0.116297
		5.77976	0.100096	0.100797
	avr.	5.43078	0.121213	0.171688
	stdev.	0.660587	0.0474602	0.0789641
	P value (CAR vs.)		<0.0001	<0.0001
	Fig1c	E16.5 gene expression
		Runx1
		Osx+ PDGFRbhi	Osx+ PDGFRblo	PaS	Osx- PDGFRb+	EC
		0.0291002	0.0619101	0.00295065	0.00533141	0.000345993
		0.0894778	0.135985	0.00177835	0.00310283	0.000506441
		0.0764371	0.122264	0.00894584	0.00830156	0.00108577
	avr.	0.0650051	0.10672	0.00455828	0.0055786	0.000646068
	stdev.	0.0317708	0.0394079	0.00384468	0.00260817	0.000389153
		Runx2
		Osx+ PDGFRbhi	Osx+ PDGFRblo	PaS	Osx- PDGFRb+	EC
		0.572992	0.765395	0.00322661	0.0289585	7.94382e-05
		0.493143	0.639412	0.00149431	0.0129859	0.000170786
		0.45554	0.43649	0.000966948	0.00243429	0.0013367
	avr.	0.507225	0.613766	0.00189596	0.0147929	0.000528974
	stdev.	0.0599787	0.165946	0.00118216	0.0133541	0.000700999

## Sheet: Fig2
	Fig2a	Prx1Cre Runx1 cKO BM (cell number)
		Control
		Total BM cells	LT-HSC	MEP	pro-E	GMP	CLP	pro-B	pre-B
		23000000	3497.65	192541	234595	48964	11039.9	467675	4.7799e+06
		23250000	3497.48	258797	324890	57259.3	19310.2	403569	3.82219e+06
		20700000	1840.2	218517	313500	38964.6	12505.3	407816	3.10585e+06
		18150000	2335.96	184593	241271	55695.3	9614.09	471052	3.48019e+06
		cKO
		Total BM cells	LT-HSC	MEP	pro-E	GMP	CLP	pro-B	pre-B
		2.37e+07	2216.85	151183	255665	38987	10867.2	466481	4.23945e+06
		21150000	2690.75	186176	227901	37764.8	15408.9	423774	3.86335e+06
		20400000	1920.03	259549	311397	54809.8	14805.5	390769	2.79435e+06
		16650000	3535.69	146093	235924	57723.4	13282.6	384307	4.67913e+06
	avr.	Total BM cells	LT-HSC	MEP	pro-E	GMP	CLP	pro-B	pre-B
	Control	21275000	2792.82	213612	278564	50220.8	13117.3	437528	3.79703e+06
	cKO	20475000	2590.83	185750	257722	47321.2	13591	416333	3.89407e+06
	stdev.	Total BM cells	LT-HSC	MEP	pro-E	GMP	CLP	pro-B	pre-B
	Control	2.37855e+06	838.557	33426	47225.1	8322.49	4293.97	36827.3	717584
	cKO	2.91505e+06	705.357	52325.9	37637.3	10409.4	2024.35	37636.1	805388
	P value (Cont vs cKO)	0.68547	0.725024	0.404052	0.515821	0.678687	0.848416	0.451512	0.863143
	Fig2d	Prx1Cre Runx2 cKO BM (%)
		Control
		LT-HSC	MEP	pro-E	GMP	CLP	pro-B	pre-B
		0.00862494	1.181	0.939455	0.463092	0.0896496	1.9802	17.3507
		0.00881592	1.1361	1.44685	0.280712	0.0639862	1.3849	23.5782
		0.00695549	0.7473	1.21672	0.486723	0.0837881	1.49743	18.6896
		0.0124692	1.41321	0.825398	0.554132	0.0502731	1.20736	13.1993
		cKO
		LT-HSC	MEP	pro-E	GMP	CLP	pro-B	pre-B
		0.00651249	1.7804	1.8454	0.67985	0.0636451	1.57323	5.64764
		0.00796495	1.283	1.4859	0.340866	0.0332434	0.857644	1.35388
		0.0101121	1.533	0.7469	0.493648	0.0940602	1.10143	8.48238
		0.00812874	0.7469	1.0819	0.349397	0.0517578	0.800511	4.61572
	avr.	LT-HSC	MEP	pro-E	GMP	CLP	pro-B	pre-B
	Control	0.00921639	1.1194	1.10711	0.446165	0.0719242	1.51747	18.2045
	cKO	0.00817958	1.33582	1.29002	0.46594	0.0606766	1.0832	5.02491
	stdev.	LT-HSC	MEP	pro-E	GMP	CLP	pro-B	pre-B
	Control	0.00232398	0.276198	0.279825	0.116852	0.0181358	0.330788	4.2776
	cKO	0.00147904	0.442021	0.47788	0.158904	0.0255304	0.351781	2.94312
	P value (Cont vs cKO)	0.480081	0.438073	0.533384	0.8477	0.49956	0.122178	0.00227317

## Sheet: Fig3
	Fig3a	Ebf3CreERT2 Runx1&Runx2 cKO BM (cell number)																		Fig3c	Ebf3CreERT2 Runx1&Runx2 cKO BM Megakaryocytes (cells/mm^2)					Fig3d	Ebf3CreERT2 Runx1&Runx2 cKO Spleen (cell number)				Fig3e	Ebf3CreERT2 Runx1&Runx2 cKO PB platelets (x10^4 / uL)
		Control																			Control						Control					Control
		Total BM cells	LT-HSC	MEP	pro-E	GMP	Gr-1hi	CLP	pro-B	pre-B	Mature B	pDC	NK		MkP		LT-HSC (%)				Megakaryocyte						LT-HSC	MEP	GMP			Platelets
		16800000	7598.39	94489.5	123463	118112	4.24662e+06	13023.9	104994	1.42218e+06	689071	167118	47291.7		40659.4		0.04653				71.5277						806.822	158396	3832.15			33.2
		15750000	7722.69	145721	134398	80556	3.39752e+06	7576.93	127283	1.67179e+06	965332	124666	60880.9		32898.5		0.0452285				67.3924						3679.22	310466	7342.11			70
		1.455e+07	5222.68	113019	192463	126680	4.30408e+06	12407.7	103099	1.11187e+06	603624	138204	34734.2		40484.8		0.0358947				71.3314						3942.02	277993	19935.7			54.3
		1.23e+07	3732.53	88912.2	133292	93904.1	2.9605e+06	8032.31	156473	917135	495063	150932	58957.7		41059		0.0303458				81.6176						963.866	300088	6534.57			57.3
		16500000	4524.8	103039	214122	142040	3.47721e+06	9660.86	112210	1.39349e+06	517425	246475	67869.9				0.0250793				102.388						3117.15	300785	4678.87			61.2
		19050000	3901.98	148681	212341	138288	5.19724e+06	10241.6	88192.7	1.01453e+06	925801	219809	62712.2				0.027423				76.3888						1835.37	280895	8108.31			75.6
		22800000	5638.34	167375	141267	85347.7	5.82304e+06	7633.08	88499.1	1.43245e+06	841844	185962	53757.7				0.0247296										689.981	400602	3349.51			49.7
		15000000	3233.91	105666	215058	145822	3.52772e+06	6773	97986.1	1.33318e+06	438063	197877	61321.1				0.0215594										2808.62	685328	9732.47			49.5
		19050000	5223.71	143745	207282	164186	4.26684e+06	9249.79	125779	1.44334e+06	715485	193271	90604.7				0.027421										4685.08	407426	13912.1			75.4
		2.37e+07	4902.81	164092	186650	96890.9	5.47183e+06	11942.5	118625	1.38597e+06	924511	197825	86225.4				0.0283257										1495.96	209202	2885.55			79.1
		Runx1&2 cKO																			Runx1&2 cKO						Runx1&2 cKO					Runx1&2 cKO
		Total BM cells	LT-HSC	MEP	pro-E	GMP	Gr-1hi	CLP	pro-B	pre-B	Mature B	pDC	NK		MkP		LT-HSC (%)				Megakaryocyte						LT-HSC	MEP	GMP			Platelets
		2.8e+06	1837.37	11789.5	7001.96	13906.4	877080	2357.98	24415.7	97441.2	184865	27563.1	14504.7		15258.2		0.0339414				42.8363						30064.9	540888	62468.8			60.2
		3000000	921.586	15463.8	16031.2	20935.2	661312	1763.75	31425.1	207818	315173	11276.9	10257.3		12109.3		0.0345975				47.1757						13780.5	372328	22183.8			71.1
		1.4e+06	469.073	7259.1	7435.51	11416.9	311915	1009.02	14319.5	67361.3	129174	20583	10605.3		7794.86		0.0471733				72.3172						20989.8	643346	54466			47.5
		2200000	1296.06	10425.7	25356.9	22657.5	496249	2659.29	20810.9	74092.6	208404	16401.1	5341.16				0.0307195				74.1136						26578.7	259565	37080.8			50
		1.7e+06	699.367	12935.6	20240.2	14618.2	439662	1805.34	19623.9	89541.9	134220	26246.9	10470.5				0.0335052				45.5168						35578.3	565449	79001.1			62.4
		2600000	1521.49	10500	20823.3	20431.7	683573	2264.56	16366.8	76040.3	203209	26011.5	9254.1				0.0411392				64.8224						46714.1	748684	89954.5			41.6
		2400000	1499.73	17782.1	21593.6	17014.7	488908	1374.39	29894.5	108574	140211	29274.9	11561.6				0.0453098										22631.9	670714	53514.4			33.1
		3000000	1108.47	9905.47	17094.4	19982.6	694723	1432.88	23665.3	204423	121842	57872.8	20109.2				0.0382693										12838.3	629761	8762.91			64.7
		6400000	1461.34	26392.6	41192.4	49390.2	1.50165e+06	2349.33	53994.1	392488	379663	35380.1	17270.8				0.0369489										14276.8	495035	50308.4			69
		4200000	944.879	19825.6	30789.1	24441.1	1.00128e+06	2056.82	46294.7	275651	278398	27845.6	12152.7				0.036805										8460.24	614932	11503.8			54.6
	avr.	Total BM cells	LT-HSC	MEP	pro-E	GMP	Gr-1hi	CLP	pro-B	pre-B	Mature B	pDC	NK		MkP		LT-HSC (%)			avr.	cells/mm^2					avr.	LT-HSC	MEP	GMP		avr.	Platelets
	Control	17550000	5170.18	127474	176034	119183	4.26726e+06	9654.17	112314	1.31259e+06	711622	182214	62435.6		38775.4		0.0312537			Control	78.441					Control	2402.41	333118	8031.14		Control	60.53
	cKO	2970000	1175.93	14227.9	20755.9	21479.5	715635	1907.34	28081	159343	209516	27845.6	12152.7		11720.8		0.0378409			cKO	57.797					cKO	23191.4	554070	46924.5		cKO	55.42
	stdev.	Total BM cells	LT-HSC	MEP	pro-E	GMP	Gr-1hi	CLP	pro-B	pre-B	Mature B	pDC	NK		MkP		LT-HSC (%)			stdev.	cells/mm^2					stdev.	LT-HSC	MEP	GMP		stdev.	Platelets
	Control	3.6187e+06	1511.02	29509.1	38273.4	28775.9	964551	2211.42	20784.6	228609	195548	37451.1	16589.2		3925.29		0.00858699			Control	12.7136					Control	1436.74	144694	5366.39		Control	14.5995
	cKO	1.43143e+06	422.562	5741.58	10235	10637.6	344573	522.916	12916.9	108636	88267.8	12581.7	4203.15		3746.83		0.00528149			cKO	14.2398					cKO	11845.6	146225	27190.3		cKO	12.3375
	P value (Cont vs cKO)	6.19618e-10	2.24103e-07	5.67803e-10	2.99452e-10	8.01103e-09	2.12409e-09	2.77568e-09	2.38517e-09	2.5224e-11	7.29363e-07	3.14817e-10	2.7335e-08		0.000256076		0.0535003			P value (Cont vs cKO)	0.0243564					P value (Cont vs cKO)	3.12512e-05	0.0032161	0.000317801		P value (Cont vs cKO)	0.408987
	Fig3b	Ebf3CreERT2 Runx1&Runx2 cKO BM RUs
		Control		Control	Doner-Derived (%)
		RUs		4wks	8wks	12wks	16wks
		368.049		55.9592	63.1895	59.9468	60.2335
		199.687		57.6405	61.2889	56.0863	45.9693
		142.418		44.5287	40.3311	38.9316	36.4853
		263.329		60.4418	64.1186	58.9993	45.6677
		254.584		49.2837	43.8416	38.4181	51.0186
		cKO		cKO	Doner-Derived (%)
		RUs		4wks	8wks	12wks	16wks
		18.413		16.5497	9.23876	8.18035	7.43457
		43.7374		24.3558	18.7191	19.0356	17.2199
		42.931		21.6482	13.9378	16.0447	17.0083
		19.604		15.2154	10.9527	10.8432	7.86907
		9.00414		13.309	6.81104	3.86016	3.7019
	avr.	RUs		4wks	8wks	12wks	16wks
	Control	245.613		53.5708	54.5539	50.4764	47.8749
	cKO	26.7379		18.2156	11.9319	11.5928	10.6468
	stdev.	RUs		4wks	8wks	12wks	16wks
	Control	83.88		6.51184	11.4941	10.8684	8.67242
	cKO	15.6994		4.61886	4.59686	6.06662	6.12251
	P value (Cont vs cKO)	0.000436354		9.13285e-06	5.74986e-05	0.000114294	5.04174e-05
	Fig3g,h	Gene expression of CAR cells (relative expression to Gapdh = 1)
		Control
		Osx	PDGFRb	Lepr	CXCL12	SCF	IL7	Foxc1	Ebf1	Ebf3	Col1a1	Co3a1	Col6a3	Gli1	PDPN	PDGFRa
		0.138151	4.01992	0.447653	54.7773	2.77466	0.746542	2.95682	0.702193	3.90769	2.6109	0.794651	0.499893	0.0015931	0	1.74055
		0.0752966	4.54648	0.60728	88.0721	2.82968	0.730134	2.27454	0.479936	3.28963	3.75562	1.10689	0.305777	0.0111184	0	1.79894
		0.10445	3.10294	0.585686	49.5165	3.14746	0.820064	2.66167	0.376326	3.10827	2.90622	1.00397	0.566896	0.00307881	0.00340578	1.51395
		0.0786131	3.12552	0.560397	76.2061	2.34903	0.66333	2.2336	0.267798	2.10019	2.41489	0.787353	0.755346	0.00911601	0	1.50136
		0.116085	6.12521	0.518869	45.5286	3.03908	0.703239	2.05984	0.316612	2.80589	6.04011	1.61414	0.439221	0	0	1.38487
		0.117015	5.7824	0.329283	42.4	1.82622	0.477586	2.21494	0.429155	1.74457	1.22559	0.494758	0.37049	0	0	1.89113
		0.176248	3.57341	0.408903	37.8733	2.30666	0.521956	2.47896	0.37521	3.71725	2.73163	1.16491	0.341543	0	0	1.46904
		0.152866	3.91762	0.472496	48.7951	2.29627	0.749473	3.0758	0.318484	2.17135	4.29321	1.77702	0.340738	0	0	2.03927
		0.0629201	4.07284	0.379684	56.2888	3.4605	0.93521	2.53072	0.465463	3.87728	3.80616	1.01123	0.238886	0	0	1.53763
		0.0524039	5.36978	0.608209	57.2891	3.42047	0.702989	2.12554	0.68247	3.14661	2.55065	0.871676	0.191131	0.00655021	0	1.18602
		Runx1&2 cKO
		Osx	PDGFRb	Lepr	CXCL12	SCF	IL7	Foxc1	Ebf1	Ebf3	Col1a1	Co3a1	Col6a3	Gli1	PDPN	PDGFRa
		0.00861108	2.36353	0.0432951	47.9393	0.855758	0.277525	1.24488	0.299554	1.19397	74.9331	56.654	4.87098	0.0677629	0.0677599	3.36969
		0.023277	1.94681	0.111348	36.4961	0.623391	0.21578	1.088	0.261356	0.98552	43.4695	24.8669	2.92437	0.0813919	0.101679	3.22465
		0.00378746	2.31079	0.0981152	22.9853	0.746482	0.201101	0.974081	0.291024	0.936705	65.1924	39.6586	3.30754	0.0450083	0.056606	3.10833
		0.0245763	1.9648	0.0548837	45.6677	1.19972	0.175792	1.0373	0.207487	1.20426	39.8496	29.5428	1.45766	0.0495943	0.0881472	2.38376
		0.012557	1.86984	0.0964924	17.4216	0.87112	0.400046	1.131	0.21048	1.0546	69.4808	45.0549	2.36158	0.0785524	0.0550017	3.23139
		0.00594509	2.1799	0.147697	34.8381	0.921536	0.291556	1.10202	0.201067	1.09079	37.0182	20.5313	2.24632	0.0454046	0.0595423	2.67437
		0.00669527	2.52679	0.190315	21.3847	0.903359	0.4222	1.07055	0.196598	0.996289	48.3853	29.0233	2.39795	0.0712558	0.130751	2.71303
		0.02039	2.34445	0.137684	17.0123	0.729137	0.252648	0.985421	0.167574	0.766834	24.0679	18.6238	2.59131	0.0617286	0.0420514	2.43344
		0.006196	2.43977	0.0838107	21.4542	0.858291	0.260154	0.951885	0.153758	0.784246	40.0155	30.7803	1.41714	0.0755572	0.0522878	3.66387
		0.0102363	1.83962	0.111436	20.0734	0.630429	0.306735	1.1367	0.22017	0.998195	31.6782	24.559	1.48081	0.0999454	0.0374737	3.28377
	avr.	Osx	PDGFRb	Lepr	CXCL12	SCF	IL7	Foxc1	Ebf1	Ebf3	Col1a1	Co3a1	Col6a3	Gli1	PDPN	PDGFRa
	Control	0.107405	4.36361	0.491846	55.6747	2.745	0.705052	2.46124	0.441365	2.98687	3.2335	1.06266	0.404992	0.00314566	0.000340578	1.60628
	cKO	0.0122272	2.17863	0.107508	28.5273	0.833922	0.280354	1.07218	0.220907	1.00114	47.409	31.9295	2.50557	0.0676201	0.06913	3.00863
	stdev.	Osx	PDGFRb	Lepr	CXCL12	SCF	IL7	Foxc1	Ebf1	Ebf3	Col1a1	Co3a1	Col6a3	Gli1	PDPN	PDGFRa
	Control	0.0405405	1.07031	0.0996185	15.4784	0.53946	0.132303	0.34797	0.14824	0.769808	1.31298	0.385795	0.167217	0.00425169	0.001077	0.256577
	cKO	0.00771759	0.253486	0.0435592	11.7052	0.167703	0.0801635	0.0890861	0.0487227	0.147463	16.9624	11.8787	1.04634	0.0176219	0.0292263	0.429735
	P value (Cont vs cKO)	8.9155e-07	6.36061e-06	1.56674e-09	0.000327771	3.13282e-09	7.50251e-08	3.71983e-10	0.00029745	2.4012e-07	1.68809e-07	1.68281e-07	6.52902e-06	1.42144e-09	6.80607e-07	5.55555e-08

## Sheet: Fig4
	Fig4b	Ebf3CreERT2 Runx1&Runx2 cKO Bone analysis							Fig4d	Ebf3CreERT2 Runx1&Runx2 cKO CTX-I				Fig4e	Ebf3CreERT2 Runx1&Runx2 cKO CAR cell count
		Control								Control					Control
		BV/TV (%)	Tb.N (/mm)	Tb.Th. (um)		Marrow area (normalized)				CTX-I (ng/ml)					cells/mm^2
		21.0491	5.64465	37.2904		1.14297				10.6068					385.168
		12.8352	3.93805	32.5928		0.938062				9.528					344.707
		20.2713	5.04152	40.2087		0.977604				10.2501					494.794
		10.9441	3.06677	35.686		1.01346				5.9026					442.016
		6.40501	2.07212	30.9104		0.942077				7.3498
		9.91528	3.28303	30.2016		1.01802									Runx1&2 cKO
		16.6888	4.30449	38.7707		0.967801				Runx1&2 cKO					cells/mm^2
		19.5631	4.78806	40.8581						CTX-I (ng/ml)					958.252
		19.8204	4.88125	40.6052						10.7815					908.772
		14.9103	3.70314	40.2638						9.3327					1065.46
										11.5293					915.369
		Runx1&2 cKO								9.282
		BV/TV (%)	Tb.N (/mm)	Tb.Th. (um)		Marrow area (normalized)				7.7208				avr.	cells/mm^2
		40.119	9.53244	42.0868		0.737438								Control	416.671
		36.618	9.26177	39.5368		0.874494								cKO	961.963
		36.865	8.6509	42.6141		0.820807			avr.	CTX-I (ng/ml)
		45.555	9.04844	50.3457		0.897513			Control	8.72746				stdev.	cells/mm^2
		33.9093	8.51855	39.8065		0.770195			cKO	9.72926				Control	65.6174
		48.736	9.50072	51.2972		0.8265								cKO	72.3994
		34.8191	6.61713	52.6196		0.875754			stdev.	CTX-I (ng/ml)				P value (Cont vs cKO)	3.0856e-05
		36.499	7.78811	46.865					Control	2.02293
		33.3427	7.6884	43.3676					cKO	1.47805
		40.0883	7.62774	52.556					P value (Cont vs cKO)	0.397361
	avr.	BV/TV (%)	Tb.N (/mm)	Tb.Th. (um)		Marrow area (normalized)
	Control	15.2403	4.07231	36.7388		1
	cKO	38.6552	8.42342	46.1095		0.828957
	stdev.	BV/TV (%)	Tb.N (/mm)	Tb.Th. (um)		Marrow area (normalized)
	Control	5.07264	1.07607	4.16091		0.0703291
	cKO	5.06506	0.965197	5.2516		0.0589697
	P value (Cont vs cKO)	5.41258e-09	1.89762e-08	0.000328556		0.00034751

## Sheet: Fig5
	Fig5a	Cultured CAR cells (Runx1 or Runx2 over expression), relative expression to Gapdh, normalized to control								Fig5b	Cultured CAR cells (Ebf3 or Ebf3+Runx1 or Ebf3+Runx2 over expression),						Fig5c	Cultured CAR cells (± PDGF ligands),					Fig5d	Cultured CAR (Foxc1 over expression),
		CAR cells from control mice									relative expression to Gapdh, normalized to control							relative expression to Gapdh, normalized to control						relative expression to Gapdh, normalized to control
		Control									Control							Control						Control
		Col1a1	Col3a1	Col6a3	PDPN	Ly6a	Foxc1				Col1a1	Col3a1						Runx1	Runx2					Runx1	Runx2
		0.842659	0.752647	1.05184	1.33147	0.813822	0.751894				0.936344	0.734603						1.02926	1.05361					1.09982	1.13362
		0.602031	0.855675	0.959973	0.879496	0.867179	0.984944				0.93359	1.01862						0.973858	1.1224					1.61145	1.26445
		1.55531	1.39168	0.988192	0.789031	1.319	1.26316				1.13007	1.24677						0.996882	0.823991					0.517865	0.804556
																								0.770859	0.797371
		Runx1 OE									Ebf3 OE							PDGF-AA
		Col1a1	Col3a1	Col6a3	PDPN	Ly6a	Foxc1				Col1a1	Col3a1						Runx1	Runx2					Foxc1
		2.86429	0.385811	0.360419	0.233045	0.402257	0.597637				0.0892329	0.516434						0.685931	0.60126					Runx1	Runx2
		6.98736	0.20508	0.477041	0.29367	0.319895	0.568842				0.173874	0.282887						0.784372	0.728357					3.61233	0.831233
		3.92038	0.45977	0.559589	0.293635	0.154759	1.00608				0.0894554	0.338323						0.592478	0.539391					5.41718	1.29997
																								5.37446	1.65368
		Runx2 OE									Ebf3+Runx1 OE							PDGF-BB						3.39404	1.0537
		Col1a1	Col3a1	Col6a3	PDPN	Ly6a	Foxc1				Col1a1	Col3a1						Runx1	Runx2
		4.4984	0.106495	0.553988	0.217191	0.0460145	0.791295				0.374298	0.0830513						0.357909	0.354587				avr.	Runx1	Runx2
		3.39505	0.117218	0.689873	0.225303	0.0537433	0.976561				0.669596	0.100065						0.461202	0.445039				Control	1	1
		3.85877	0.268872	0.46538	0.283001	0.157048	0.558568				0.475953	0.0791381						0.391621	0.361284				Foxc1 OE	4.4495	1.20964
											Ebf3+Runx2 OE												stdev.	Runx1	Runx2
	avr.	Col1a1	Col3a1	Col6a3	PDPN	Ly6a	Foxc1				Col1a1	Col3a1					avr.	Runx1	Runx2				Control	0.472158	0.235971
	Control	1	1	1	1	1	1				0.0771692	0.060472					Control	1	1				Foxc1 OE	1.09648	0.352532
	Runx1 OE	4.59068	0.35022	0.465683	0.27345	0.292304	0.724187				0.253095	0.0603297					PDGF-AA	0.687594	0.623003				P value (Cont vs Foxc1 OE)	0.00117342	0.361134
	Runx2 OE	3.91741	0.164195	0.569747	0.241832	0.085602	0.775475				0.611572	0.0528233					PDGF-BB	0.403577	0.38697
	stdev.	Col1a1	Col3a1	Col6a3	PDPN	Ly6a	Foxc1			avr.	Col1a1	Col3a1					stdev.	Runx1	Runx2
	Control	0.495734	0.343092	0.0470556	0.290605	0.277547	0.255966			Control	1	1					Control	0.0278329	0.156261
	Runx1 OE	2.1417	0.131022	0.10007	0.0349915	0.126035	0.244552			Ebf3 OE	0.117521	0.379215					PDGF-AA	0.0959579	0.096341
	Runx2 OE	0.554008	0.0908114	0.113073	0.0358832	0.0619948	0.209445			Ebf3+Runx1 OE	0.506616	0.0874182					PDGF-BB	0.0526743	0.0504003
	P value (Cont vs Runx1 OE)	0.0269	0.0191	0.0007	0.0035	0.0052	0.4611			Ebf3+Runx2 OE	0.313945	0.057875
	P value (Cont vs Runx2 OE)	0.0594	0.006	0.0021	0.0029	0.0014	0.4184										P value (Cont vs PDGF-AA)	0.002	0.0101
										stdev.	Col1a1	Col3a1					P value (Cont vs PDGF-BB)	<0.0001	0.0009
										Control	0.112649	0.256592
		CAR cells from Ebf3CreER Runx1&Runx2 cKO mice								Ebf3 OE	0.0488037	0.122025
		Control								Ebf3+Runx1 OE	0.150018	0.011126
		Col1a1	Col3a1	Col6a3	PDPN					Ebf3+Runx2 OE	0.272348	0.00437548
		13.276	2.12395	1.28232	4.60764
		16.5264	2.85489	1.26632	2.0725					P value (Cont vs Ebf3 OE)	0.0005	0.0018
		17.6216	2.4677	1.22123	3.39106					P value (Cont vs Ebf3+R1 OE)	0.0172	0.0001
										P value (Cont vs Ebf3+R2 OE)	0.0026	0.0001
		Runx1 OE
		Col1a1	Col3a1	Col6a3	PDPN
		23.0965	0.475391	0.621512	0.856049
		21.581	0.587109	0.589827	1.05745
		23.2538	0.680131	0.695561	1.53341
		Runx2 OE
		Col1a1	Col3a1	Col6a3	PDPN
		30.2976	0.754181	0.787008	0.527982
		19.4286	0.714117	0.737187	0.547247
		20.9512	0.714451	0.603549	1.04071
	avr.	Col1a1	Col3a1	Col6a3	PDPN
	Control	15.808	2.48218	1.25662	3.35707
	Runx1 OE	22.6438	0.580877	0.635633	1.14897
	Runx2 OE	23.5591	0.727583	0.709248	0.705314
	stdev.	Col1a1	Col3a1	Col6a3	PDPN
	Control	2.26015	0.365683	0.0316768	1.26791
	Runx1 OE	0.92373	0.102512	0.0542631	0.347828
	Runx2 OE	5.88518	0.0230351	0.094867	0.290624
	P value (Cont vs Runx1 OE)	0.1078	<0.0001	<0.0001	0.0233
	P value (Cont vs Runx2 OE)	0.0721	0.0001	0.0001	0.0104
	P value (Control mice (control) vs
	Runx1&Runx2 cKO mice (control))	0.000376771	0.0068874	0.00143236	0.0348969

## Sheet: Fig6
	Fig6d,e	Gene expression of CAR cells (relative expression to Gapdh = 1)
		CAR cells from control mice
		Runx1	Runx2	CXCL12	SCF	Foxc1	Ebf1	Ebf3	Col1a1	Col3a1	Col6a3	Gli1
		1.90551	0.808694	37.8842	1.79689	1.24299	0.175112	1.53745	3.03585	1.45109	0.250618	0.004037
		2.47758	1.16487	49.6131	1.07756	1.77689	0.243917	1.94861	2.24379	1.02199	0.177203	0.0020419
		2.37783	1.02875	35.7874	1.43648	1.27476	0.189054	1.38836	2.43872	0.915287	0.238502	0.0037052
		1.88023	0.728219	35.7645	1.29469	1.41499	0.207895	1.49796	2.53186	0.744135	0.164898	0.0015528
		CAR cells from PMF mice
		Runx1	Runx2	CXCL12	SCF	Foxc1	Ebf1	Ebf3	Col1a1	Col3a1	Col6a3	Gli1
		0.743196	0.435302	4.49353	0.137402	0.206021	0.0537509	0.159754	30.4333	4.63648	1.38336	0.0496587
		0.746044	0.361423	8.98135	0.252368	0.311322	0.0394246	0.326761	42.1099	5.83918	1.3553	0.0722127
		0.787216	0.431991	7.81173	0.286921	0.298459	0.0648528	0.266914	24.6241	7.67139	1.05233	0.0510698
		0.684056	0.43297	6.67391	0.117721	0.393137	0.0697986	0.213138	20.7527	4.78875	1.45861	0.0453327
	avr.	Runx1	Runx2	CXCL12	SCF	Foxc1	Ebf1	Ebf3	Col1a1	Col3a1	Col6a3	Gli1
	Control	2.16029	0.932635	39.7623	1.4014	1.42741	0.203994	1.59309	2.56256	1.03313	0.207805	0.00283423
	PMF	0.740128	0.415422	6.99013	0.198603	0.302235	0.0569567	0.241642	29.48	5.73395	1.3124	0.0545685
	stdev.	Runx1	Runx2	CXCL12	SCF	Foxc1	Ebf1	Ebf3	Col1a1	Col3a1	Col6a3	Gli1
	Control	0.311631	0.200267	6.64195	0.302161	0.244679	0.0298128	0.245255	0.337587	0.301229	0.0430221	0.00122135
	PMF	0.0424491	0.0360259	1.9125	0.0836225	0.0766315	0.0134773	0.071652	9.3125	1.39792	0.178783	0.0120134
	P value (Cont vs PMF)	0.000103252	0.00225742	7.83343e-05	0.000256315	0.000121258	0.000106047	4.19916e-05	0.00117534	0.000593859	2.0172e-05	0.000138741

## Sheet: FigS1
	Supplementary Fig1b
		Prx1Cre Runx1 cKO gene expression (relative expression to Gapdh = 1)
		Control
		Runx1	Runx2	Osx	PDGFRb	Lepr	CXCL12	SCF	IL-7	Foxc1	Ebf1	Ebf3
		2.88899	1.37766	0.108887	4.26907	0.350203	32.0494	1.48031	0.94462	1.93888	0.38134	2.72836
		3.07397	2.10736	0.0937263	4.26357	0.380063	70.3343	2.18305	0.908765	1.59242	0.359468	1.48514
		3.79761	0.995824	0.104347	2.11748	0.18764	37.6607	1.1151	0.704003	2.01411	0.496147	3.23074
		2.18818	2.03019	0.0929762	2.43475	0.268929	38.9673	1.96741	0.782097	1.40927	0.440467	2.0754
		cKO
		Runx1	Runx2	Osx	PDGFRb	Lepr	CXCL12	SCF	IL-7	Foxc1	Ebf1	Ebf3
		0	1.34808	0.0275108	3.28665	0.386028	28.9511	1.56622	0.770665	1.30031	0.290746	1.59622
		0.000669351	1.16775	0.0403877	4.42196	0.502338	59.8881	1.97207	0.565511	1.59149	0.244915	1.62735
		0.00279512	1.01548	0.0169178	3.74025	0.366278	43.5582	1.71338	0.477962	1.37389	0.235819	1.54305
		0.000354493	1.60965	0.0780515	1.9755	0.203234	96.9901	1.45467	0.749453	1.624	0.444192	2.17898
	avr.	Runx1	Runx2	Osx	PDGFRb	Lepr	CXCL12	SCF	IL-7	Foxc1	Ebf1	Ebf3
	Control	2.98719	1.62776	0.099984	3.27122	0.296709	44.7529	1.68647	0.834871	1.73867	0.419356	2.37991
	cKO	0.00095474	1.28524	0.0407169	3.35609	0.364469	57.3469	1.67658	0.640898	1.47242	0.303918	1.7364
	stdev.	Runx1	Runx2	Osx	PDGFRb	Lepr	CXCL12	SCF	IL-7	Foxc1	Ebf1	Ebf3
	Control	0.661407	0.533496	0.00788583	1.15633	0.0865589	17.3163	0.481137	0.111679	0.286265	0.0615746	0.761287
	cKO	0.00125701	0.255452	0.0266757	1.03191	0.123116	29.2944	0.223678	0.142425	0.159669	0.0965558	0.297099
	P value (Cont vs cKO)	0.000103319	0.290823	0.00531405	0.916354	0.402559	0.487134	0.971485	0.0757858	0.155385	0.0903931	0.166348

## Sheet: FigS2
	Supplementary Fig2
		Prx1Cre Runx2 cKO gene expression (relative expression to Gapdh = 1)
		Control
		Runx1	Runx2	Osx	PDGFRb	Lepr	CXCL12	SCF	IL-7	Foxc1	Ebf1	Ebf3
		2.79564	1.65327	0.154266	3.96035	0.290795	37.6607	2.09424	1.48234	2.15858	0.657084	2.43459
		2.23582	1.26933	0.225178	4.45663	0.367278	45.4237	3.26081	1.26905	2.04477	0.440467	2.51282
		2.80921	1.37766	0.0804093	4.73466	0.375095	38.9673	2.79615	0.888857	2.01411	0.523019	2.0754
		2.09804	0.995824	0.112976	5.37446	0.442317	47.685	3.46191	1.32531	2.99343	0.482458	1.48514
		cKO
		Runx1	Runx2	Osx	PDGFRb	Lepr	CXCL12	SCF	IL-7	Foxc1	Ebf1	Ebf3
		2.07144	0.00432686	0.0457248	3.39769	0.174863	28.6461	2.29048	0.592545	1.87437	0.452654	1.53101
		2.68721	0	0.0560661	5.29635	0.353281	45.9303	3.52365	0.731038	2.27674	0.552392	2.07389
		2.36966	0	0.0520429	3.9945	0.280861	38.5231	2.35684	0.409651	2.05408	0.526143	1.86293
		2.13697	0.00630701	0.0310055	4.35903	0.272369	37.892	2.1876	0.446832	1.80835	0.612056	1.82261
	avr.	Runx1	Runx2	Osx	PDGFRb	Lepr	CXCL12	SCF	IL-7	Foxc1	Ebf1	Ebf3
	Control	2.48468	1.32402	0.143207	4.63153	0.368871	42.4342	2.90328	1.24139	2.30272	0.525757	2.12699
	cKO	2.31632	0.00265847	0.0462098	4.26189	0.270344	37.7479	2.58964	0.545016	2.00338	0.535811	1.82261
	stdev.	Runx1	Runx2	Osx	PDGFRb	Lepr	CXCL12	SCF	IL-7	Foxc1	Ebf1	Ebf3
	Control	0.371231	0.272021	0.0624473	0.589818	0.0619986	4.87558	0.607155	0.251756	0.464647	0.0938144	0.468372
	cKO	0.278409	0.00317439	0.0109936	0.795381	0.0732798	7.08088	0.626549	0.147	0.209743	0.0660727	0.223457
	P value (Cont vs cKO)	0.495378	6.83065e-05	0.0222395	0.483534	0.0858954	0.317455	0.499197	0.00307114	0.284746	0.866657	0.285227

## Sheet: FigS3
	Supplementary Fig3c										Supplementary Fig3d
		Prx1Cre Osx cKO BM(%)										Prx1Cre Osx cKO gene expression (relative expression to Gapdh = 1)
		Control										Control
		LT-HSC	MEP	pro-E	GMP	CLP	pro-B	pre-B				Runx1	Runx2	Osx	PDGFRb	Lepr	CXCL12	SCF	IL-7	Foxc1	Ebf1	Ebf3
		0.00901862	0.970869	1.11096	0.255431	0.109621	3.73843	23.7371				1.93099	1.63895	0.142488	2.43475	0.113555	31.7517	1.48944	0.743809	2.09946	0.324597	1.88569
		0.0135854	1.32098	1.29821	0.282624	0.0685192	3.16554	25.1625				2.18818	1.54048	0.295496	2.11354	0.141406	35.9574	1.81814	0.908765	1.20098	0.465463	1.37062
		0.0108313	1.26872	1.17527	0.226348	0.0871304	1.9027	19.4462				1.56299	1.44864	0.300597	1.6273	0.184404	50.2352	1.46795	0.704003	1.77884	0.68247	1.50776
		0.0124692	1.20679	0.995656	0.249984	0.0534257	1.91162	21.3298				1.43237	1.80435	0.275178	1.83781	0.146326	49.0493	2.31454	0.955246	1.40927	0.318484	2.56633
		cKO										cKO
		LT-HSC	MEP	pro-E	GMP	CLP	pro-B	pre-B				Runx1	Runx2	Osx	PDGFRb	Lepr	CXCL12	SCF	IL-7	Foxc1	Ebf1	Ebf3
		0.00878896	1.21836	1.14436	0.266226	0.0277586	2.22196	16.1684				1.94308	1.15189	0	3.01003	0.198562	54.9993	2.72195	0.707789	1.803	0.84421	1.46092
		0.0121968	1.12006	1.33732	0.292465	0.0582737	3.02557	16.316				1.2962	1.44957	0	2.45505	0.228334	31.2646	1.56868	0.984612	1.55539	0.417457	3.00222
		0.0104177	0.875709	1.24611	0.230268	0.0442985	1.6418	15.0922				1.61208	2.0303	0	1.76923	0.144516	30.1265	1.21099	0.720537	1.69656	0.459141	1.97473
		0.00726	0.742474	1.18434	0.334098	0.047489	1.88534	19.9179				1.55955	1.11144	0	2.28309	0.0889942	54.5261	3.42686	0.669249	1.39708	0.274739	1.04521
	avr.	LT-HSC	MEP	pro-E	GMP	CLP	pro-B	pre-B			avr.	Runx1	Runx2	Osx	PDGFRb	Lepr	CXCL12	SCF	IL-7	Foxc1	Ebf1	Ebf3
	Control	0.0114761	1.19184	1.14502	0.253597	0.0796742	2.67957	22.4189			Control	1.77863	1.6081	0.25344	2.00335	0.146423	41.7484	1.77252	0.827956	1.62214	0.447754	1.8326
	cKO	0.00966589	0.98915	1.22803	0.280764	0.0444549	2.19367	16.8736			cKO	1.60272	1.4358	0	2.37935	0.165102	42.7292	2.23212	0.770547	1.61301	0.498887	1.87077
	stdev.	LT-HSC	MEP	pro-E	GMP	CLP	pro-B	pre-B			stdev.	Runx1	Runx2	Osx	PDGFRb	Lepr	CXCL12	SCF	IL-7	Foxc1	Ebf1	Ebf3
	Control	0.00199084	0.154532	0.126295	0.0231049	0.0242615	0.922069	2.53561			Control	0.345126	0.152169	0.0747785	0.34979	0.0291434	9.28798	0.395293	0.122717	0.397945	0.170571	0.535451
	cKO	0.00212354	0.218626	0.0840244	0.0437517	0.0126354	0.603457	2.10154			cKO	0.265675	0.424043	0	0.511533	0.0614655	13.9043	1.02473	0.144366	0.17609	0.243379	0.844695
	P value (Cont vs cKO)	0.259962	0.180756	0.315748	0.314231	0.0420499	0.411779	0.0150867			P value (Cont vs cKO)	0.45005	0.473323	0.000503961	0.270535	0.602706	0.910445	0.434705	0.566732	0.967886	0.742512	0.941639

## Sheet: FigS4
	FigS4a	Ebf3CreERT2 Runx1 cKO BM (cell number)												FigS4b,c	Ebf3CreERT2 Runx1 cKO gene expression (relative expression to Gapdh = 1)
	FigS4d	Ebf3CreERT2 Runx2 cKO BM (cell number)												FigS4e,f	Ebf3CreERT2 Runx2 cKO gene expression (relative expression to Gapdh = 1)
		Control													Control
		Total BM cells	LT-HSC	MEP	pro-E	GMP	CLP	pro-B	pre-B		LT-HSC (%)				Runx1	Runx2	Osx	PDGFRb	Lepr	CXCL12	SCF	IL7	Foxc1	Ebf1	Ebf3	Col1a1	Col3a1	Col6a3
		16800000	7598.39	94489.5	123463	118112	13023.9	104994	1.42218e+06		0.04653				3.58707	1.77317	0.138151	4.01992	0.447653	54.7773	2.77466	0.746542	2.95682	0.702193	3.90769	2.6109	0.794651	0.499893
		15750000	7722.69	145721	134398	80556	7576.93	127283	1.67179e+06		0.0452285				2.86434	1.53712	0.0752966	4.54648	0.60728	88.0721	2.82968	0.730134	2.27454	0.479936	3.28963	3.75562	1.10689	0.305777
		1.455e+07	5222.68	113019	192463	126680	12407.7	133099	1.11187e+06		0.0358947				3.17124	1.57255	0.10445	3.10294	0.585686	49.5165	3.14746	0.820064	2.66167	0.376326	3.10827	2.90622	1.00397	0.566896
		1.23e+07	3732.53	88912.2	133292	93904.1	8032.31	156473	917135		0.0303458				2.66061	1.18346	0.0786131	3.12552	0.560397	76.2061	2.34903	0.66333	2.2336	0.267798	2.10019	2.41489	0.787353	0.755346
		16500000	4524.8	103039	214122	142040	9660.86	132210	1.39349e+06		0.0250793				2.46773	1.87247	0.116085	6.12521	0.518869	45.5286	3.03908	0.703239	2.05984	0.316612	2.80589	6.04011	1.61414	0.439221
		19050000	3901.98	148681	212341	138288	10241.6	138193	1.01453e+06		0.027423				2.2719	1.85719	0.117015	5.7824	0.329283	42.4	1.82622	0.477586	2.21494	0.429155	1.74457	1.22559	0.494758	0.37049
		22800000	5638.34	167375	141267	85347.7	7633.08	128499	1.43245e+06		0.0247296				2.95787	2.36143	0.176248	3.57341	0.408903	37.8733	2.30666	0.521956	2.47896	0.37521	3.71725	2.73163	1.16491	0.341543
		15000000	3233.91	105666	215058	145822	6773	117986	1.33318e+06		0.0215594				2.6883	2.20817	0.152866	3.91762	0.472496	48.7951	2.29627	0.749473	3.0758	0.318484	2.17135	4.29321	1.77702	0.340738
		19050000	5223.71	143745	207282	164186	9249.79	125779	1.44334e+06		0.027421				3.84282	1.83796	0.0629201	4.07284	0.379684	56.2888	3.4605	0.93521	2.53072	0.465463	3.87728	3.80616	1.01123	0.238886
		2.37e+07	4902.81	164092	186650	96890.9	11942.5	118625	1.38597e+06		0.0283257				2.93467	1.65327	0.0524039	5.36978	0.608209	57.2891	3.42047	0.702989	2.12554	0.68247	3.14661	2.55065	0.871676	0.191131
		Runx1 cKO													Runx1 cKO
		Total BM cells	LT-HSC	MEP	pro-E	GMP	CLP	pro-B	pre-B		LT-HSC (%)				Runx1	Runx2	Osx	PDGFRb	Lepr	CXCL12	SCF	IL-7	Foxc1	Ebf1	Ebf3	Col1a1	Col3a1	Col6a3
		15900000	3542.34	91476.5	154777	150582	6425.62	111615	1.13403e+06		0.0437553				0.0641397	1.38402	0.0168267	5.11369	0.320326	63.8823	3.54848	0.94663	2.72602	0.439134	2.32628	3.16075	1.28683	0.609741
		1.71e+07	4391	167879	167875	85657.1	7052.77	103059	784969		0.0378612				0.0233733	2.3879	0.0610509	5.81306	0.389467	48.9171	2.40028	0.601318	2.54293	0.348503	4.07884	2.73597	1.12714	0.738042
		1.665e+07	3844.27	87765	158068	109265	8838.38	104356	1.04794e+06		0.0256783				0.0606784	1.33167	0.0209681	4.15873	0.531584	37.3323	2.45575	0.497591	1.59461	0.372914	2.47961	2.67101	1.28899	0.556366
		19360000	3103.79	97663.1	143653	153393	8830.68	138135	1.2378e+06		0.0285447				0.00099579	1.30758	0.049695	3.88331	0.488383	41.5935	2.54412	0.41701	1.6612	0.500772	3.03197	4.95582	0.980575	0.300405
		Runx2 cKO													Runx2 cKO
		Total BM cells	LT-HSC	MEP	pro-E	GMP	CLP	pro-B	pre-B		LT-HSC (%)				Runx1	Runx2	Osx	PDGFRb	Lepr	CXCL12	SCF	IL-7	Foxc1	Ebf1	Ebf3	Col1a1	Col3a1	Col6a3
		15750000	7888.8	110527	192637	81509.6	6212.86	134435	605901		0.0373045				2.1007	0.0205459	0.0219637	3.30223	0.419045	79.0117	1.56138	0.277444	1.721	0.372363	1.54816	2.95953	1.40271	0.419212
		18300000	2843.64	107289	211423	153725	7979.1	75730.7	558923		0.0336763				2.46784	0.0281773	0.0197293	4.4335	0.402725	51.4058	2.38966	0.395183	1.63158	0.448397	2.7757	6.67374	1.23345	0.724473
		1.455e+07	3679.94	131131	173966	101826	8280.28	108581	842135		0.0423139				3.10587	0.042545	0.0247621	4.33862	0.437791	79.6528	3.04199	0.547264	2.14093	0.296625	3.07314	3.88729	1.92342	0.661635
		13650000	4663.77	137401	154836	84545.4	7431.38	80033.7	658928		0.0252917				2.60813	0.0384414	0.0176464	3.11664	0.355853	46.0998	1.88011	0.358064	1.78083	0.252564	1.89607	2.86707	1.4138	0.544526
	avr.	Total BM cells	LT-HSC	MEP	pro-E	GMP	CLP	pro-B	pre-B		LT-HSC (%)			avr.	Runx1	Runx2	Osx	PDGFRb	Lepr	CXCL12	SCF	IL-7	Foxc1	Ebf1	Ebf3	Col1a1	Col3a1	Col6a3
	Control	17550000	5170.18	127474	176034	119183	9654.17	128314	1.31259e+06		0.0312537			Control	2.94465	1.78568	0.107405	4.36361	0.491846	55.6747	2.745	0.705052	2.46124	0.441365	2.98687	3.2335	1.06266	0.404992
	Runx1 cKO	17252500	3720.35	111196	156093	124724	7786.86	114291	1.05118e+06		0.0339599			Runx1 cKO	0.0372968	1.60279	0.0371352	4.7422	0.43244	47.9313	2.73716	0.615637	2.13119	0.415331	2.97917	3.38089	1.17088	0.551139
	Runx2 cKO	15562500	4769.04	121587	183216	105402	7475.9	99695	666472		0.0346466			Runx2 cKO	2.57063	0.0324274	0.0210254	3.79774	0.403853	64.0425	2.21829	0.394489	1.81858	0.342487	2.32327	4.09691	1.49335	0.587461
	stdev.	Total BM cells	LT-HSC	MEP	pro-E	GMP	CLP	pro-B	pre-B		LT-HSC (%)			stdev.	Runx1	Runx2	Osx	PDGFRb	Lepr	CXCL12	SCF	IL-7	Foxc1	Ebf1	Ebf3	Col1a1	Col3a1	Col6a3
	Control	3.6187e+06	1511.02	29509.1	38273.4	28775.9	2211.42	13664.6	228609		0.00858699			Control	0.483497	0.335482	0.0405405	1.07031	0.0996185	15.4784	0.53946	0.132303	0.34797	0.14824	0.769808	1.31298	0.385795	0.167217
	Runx1 cKO	1.48964e+06	540.666	38008.8	9986.79	32943.1	1236.54	16335.5	193707		0.00834824			Runx1 cKO	0.030435	0.524378	0.0216296	0.887486	0.0955255	11.6607	0.544114	0.233202	0.586562	0.0686341	0.793282	1.07218	0.147788	0.183722
	Runx2 cKO	2.01758e+06	2208.86	14921.3	24326.7	33435.4	912.412	27365.7	124030		0.00717188			Runx2 cKO	0.416049	0.00996273	0.00305185	0.684633	0.035061	17.7894	0.646463	0.113088	0.223477	0.0862145	0.718866	1.77859	0.298359	0.134691
	P value (Cont vs Runx1 cKO)	0.87854	0.0915521	0.404549	0.334483	0.759225	0.142773	0.125173	0.0680783		0.601493			P value (Cont vs Runx1 cKO)	6.23611e-08	0.4449	0.00717684	0.545132	0.328632	0.38818	0.980831	0.373423	0.209299	0.746242	0.986895	0.846222	0.602684	0.175308
	P value (Cont vs Runx2 cKO)	0.32766	0.699069	0.7151	0.736917	0.452639	0.0860382	0.0202574	0.0001997		0.500501			P value (Cont vs Runx2 cKO)	0.201249	2.8941e-07	0.00133518	0.352149	0.116915	0.396548	0.143053	0.00145011	0.00546938	0.240769	0.164382	0.331964	0.0699185	0.0774188

[truncated: 3 more sheets: FigS5, FigS6, FigS7]
